# Supplementary material for: Synthesis of 9-Hydroxy-1H-Benzo[f]chromene Derivatives with Effective Cytotoxic Activity on MCF7/ADR, P-Glycoprotein Inhibitors, Cell Cycle Arrest and Apoptosis Effects
Source: MDPI journal article supplement (doi:10.3390/ijms24010049), 2022-12-20
Supplement: s1 [file s1]

## **Supplementary Material**

# **Synthesis of 9-Hydroxy-1*H*-Benzo[*f*]chromene Derivatives with Effective Cytotoxic Activity on MCF7/ADR, *P*-Glycoprotein Inhibitors, Cell Cycle Arrest and Apoptosis**

Fawzia F. Albalawi 1,\* , Mohammed A. A. El-Nassag 2, Raafat A. El-Eisawy 2,3, Mahmoud Basseem I. Mohamed 2 , Ahmed M. Fouda 4 , Tarek H. Afifi 1 , Ahmed A. Elhenawy 2,5 , Ahmed Mora 2 , Ahmed M. El-Agrody 2,\* and Heba K. A. El-Mawgoud 6

1 Chemistry Department, Faculty of Science, Taibah University,  
Al-Madinah Al-Munawarah 30002, Saudi Arabia

2 Chemistry Department, Faculty of Science, Al-Azhar University, Cairo 11884, Egypt

3 Chemistry Department, Faculty of Science and Art, Al-Baha University, Al-Baha 65582, Saudi Arabia

4 Chemistry Department, Faculty of Science, King Khalid University, Abha 61413, Saudi Arabia

5 Chemistry Department, Faculty of Science and Art, Albaha University, Albahah 65731, Saudi Arabia

6 Chemistry Department, Faculty of Women for Arts, Science, and Education, Ain Shams University,  
Cairo 11757, Egypt

\* Correspondence: ffs.chem443@gmail.com (F.F.A.); elagrody\_am@azhar.edu.eg (A.M.E.-A.)

| Table of Contents:                                            | Page |
|---------------------------------------------------------------|------|
| <b>Figure S1:</b> $^1\text{H}$ NMR 8.5-6.5 ppm of cpd. (4a).  | S4   |
| <b>Figure S2:</b> $^1\text{H}$ NMR of cpd. (4a).              | S5   |
| <b>Figure S3:</b> $^{13}\text{C}$ NMR of cpd. (4a).           | S6   |
| <b>Figure S4:</b> $^1\text{H}$ NMR 8.5-6.5 ppm of cpd. (4b).  | S7   |
| <b>Figure S5:</b> $^1\text{H}$ NMR of cpd. (4b).              | S8   |
| <b>Figure S6:</b> $^{13}\text{C}$ NMR of cpd. (4b).           | S9   |
| <b>Figure S7:</b> $^1\text{H}$ NMR of cpd. (4c).              | S10  |
| <b>Figure S8:</b> $^{13}\text{C}$ NMR ppm of cpd. (4c).       | S11  |
| <b>Figure S9:</b> $^1\text{H}$ NMR 8.5-6.5 ppm of cpd. (4d).  | S12  |
| <b>Figure S10:</b> $^1\text{H}$ NMR of cpd. (4d).             | S13  |
| <b>Figure S11:</b> $^{13}\text{C}$ NMR of cpd. (4d).          | S14  |
| <b>Figure S12:</b> $^1\text{H}$ NMR of cpd. (4e).             | S15  |
| <b>Figure S13:</b> $^{13}\text{C}$ NMR ppm of cpd. (4e).      | S16  |
| <b>Figure S14:</b> $^1\text{H}$ NMR 8.5-6.5 ppm of cpd. (4f). | S17  |
| <b>Figure S15:</b> $^1\text{H}$ NMR of cpd. (4f).             | S18  |
| <b>Figure S16:</b> $^{13}\text{C}$ NMR of cpd. (4f).          | S19  |
| <b>Figure S17:</b> $^1\text{H}$ NMR 8.5-6.5 ppm of cpd. (4g). | S20  |
| <b>Figure S18:</b> $^1\text{H}$ NMR of cpd. (4g).             | S21  |
| <b>Figure S19:</b> $^{13}\text{C}$ NMR of cpd. (4g).          | S22  |
| <b>Figure S20:</b> $^1\text{H}$ NMR 8.5-6.5 ppm of cpd. (4h). | S23  |
| <b>Figure S21:</b> $^1\text{H}$ NMR of cpd. (4h).             | S24  |
| <b>Figure S22:</b> $^{13}\text{C}$ NMR of cpd. (4h).          | S25  |
| <b>Figure S23:</b> $^1\text{H}$ NMR 8.5-6.5 ppm of cpd. (4i). | S26  |
| <b>Figure S24:</b> $^1\text{H}$ NMR of cpd. (4i).             | S27  |
| <b>Figure S25:</b> $^{13}\text{C}$ NMR of cpd. (4i).          | S28  |
| <b>Figure S26:</b> $^1\text{H}$ NMR of cpd. (4j).             | S29  |
| <b>Figure S27:</b> $^{13}\text{C}$ NMR of cpd. (4j).          | S30  |
| <b>Figure S28:</b> $^1\text{H}$ NMR 8.5-6.5 ppm of cpd. (4k). | S31  |
| <b>Figure S29:</b> $^1\text{H}$ NMR of cpd. (4k).             | S32  |
| <b>Figure S30:</b> $^{13}\text{C}$ NMR of cpd. (4k).          | S33  |
| <b>Figure S31:</b> $^1\text{H}$ NMR 8.5-6.5 ppm of cpd. (4l). | S34  |
| <b>Figure S32:</b> $^1\text{H}$ NMR of cpd. (4l).             | S35  |
| <b>Figure S33:</b> $^{13}\text{C}$ NMR of cpd. (4l).          | S36  |

|                                                                                                  |     |
|--------------------------------------------------------------------------------------------------|-----|
| <b>Figure S34:</b> $^1\text{H}$ NMR 8.5-6.5 ppm of cpd. ( <b>4m</b> ).                           | S37 |
| <b>Figure S35:</b> $^1\text{H}$ NMR of cpd. ( <b>4m</b> ).                                       | S38 |
| <b>Figure S36:</b> $^{13}\text{C}$ NMR of cpd. ( <b>4m</b> ).                                    | S39 |
| <b>Figure S37:</b> $^1\text{H}$ NMR 8.5-6.5 ppm of cpd. ( <b>4n</b> ).                           | S40 |
| <b>Figure S38:</b> $^1\text{H}$ NMR of cpd. ( <b>4n</b> ).                                       | S41 |
| <b>Figure S39:</b> $^{13}\text{C}$ NMR of cpd. ( <b>4n</b> ).                                    | S42 |
| <b>Figure S40:</b> $^1\text{H}$ NMR 8.5-6.5 ppm of cpd. ( <b>4o</b> ).                           | S43 |
| <b>Figure S41:</b> $^1\text{H}$ NMR of cpd. ( <b>4o</b> ).                                       | S44 |
| <b>Figure S42:</b> $^{13}\text{C}$ NMR ppm of cpd. ( <b>4o</b> ).                                | S45 |
| <b>Figure S43:</b> $^1\text{H}$ NMR 8.5-6.5 ppm of cpd. ( <b>4p</b> ).                           | S46 |
| <b>Figure S44:</b> $^1\text{H}$ NMR 10.5-6.5 ppm of cpd. ( <b>4p</b> ).                          | S47 |
| <b>Figure S45:</b> $^1\text{H}$ NMR of cpd. ( <b>4p</b> ).                                       | S48 |
| <b>Figure S46:</b> $^{13}\text{C}$ NMR of cpd. ( <b>4p</b> ).                                    | S49 |
| <b>Figure S47:</b> $^1\text{H}$ NMR 12-0 ppm of cpd. ( <b>4c</b> ).                              | S50 |
| <b>Figure S48:</b> $^{13}\text{C}$ NMR 200-0 ppm of cpd. ( <b>4c</b> ).                          | S51 |
| <b>Figure S49:</b> $^1\text{H}$ NMR 12-0 ppm of cpd. ( <b>4e</b> ).                              | S52 |
| <b>Figure S50:</b> $^{13}\text{C}$ NMR 200-0 ppm of cpd. ( <b>4e</b> ).                          | S53 |
| <b>Figure S51:</b> $^1\text{H}$ NMR 12-0 ppm of cpd. ( <b>4f</b> ).                              | S54 |
| <b>Figure S52:</b> $^1\text{H}$ NMR 12-0 ppm of cpd. ( <b>4o</b> ).                              | S55 |
| <b>Table S1:</b> The optimization Microwave irradiation condition for Synthesis of <b>4a-p</b> . | S56 |

---

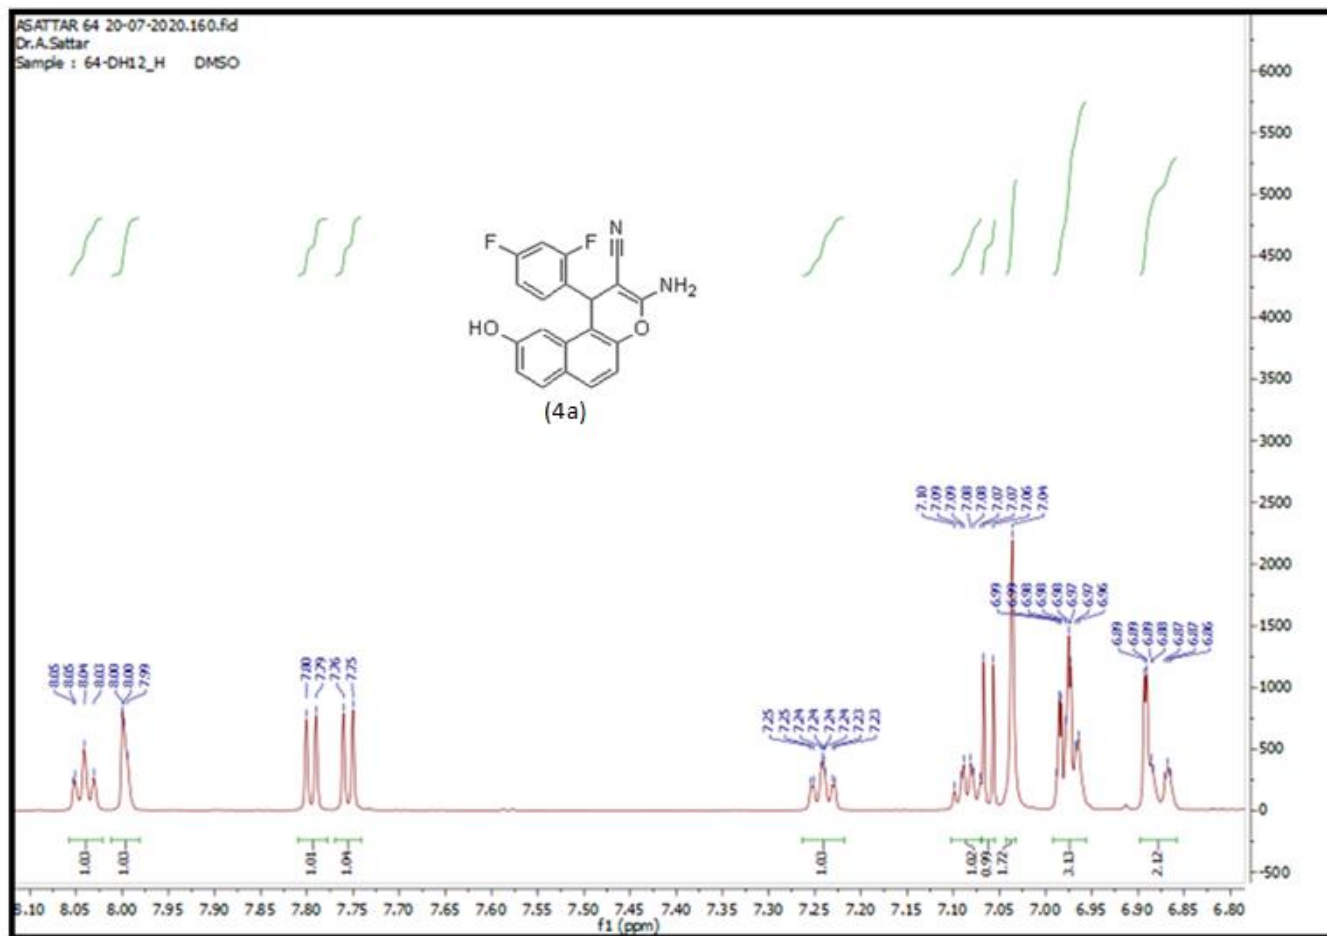

**Figure S1:**  $^1\text{H}$  NMR 8.5-6.5 ppm of cpd. (4a).

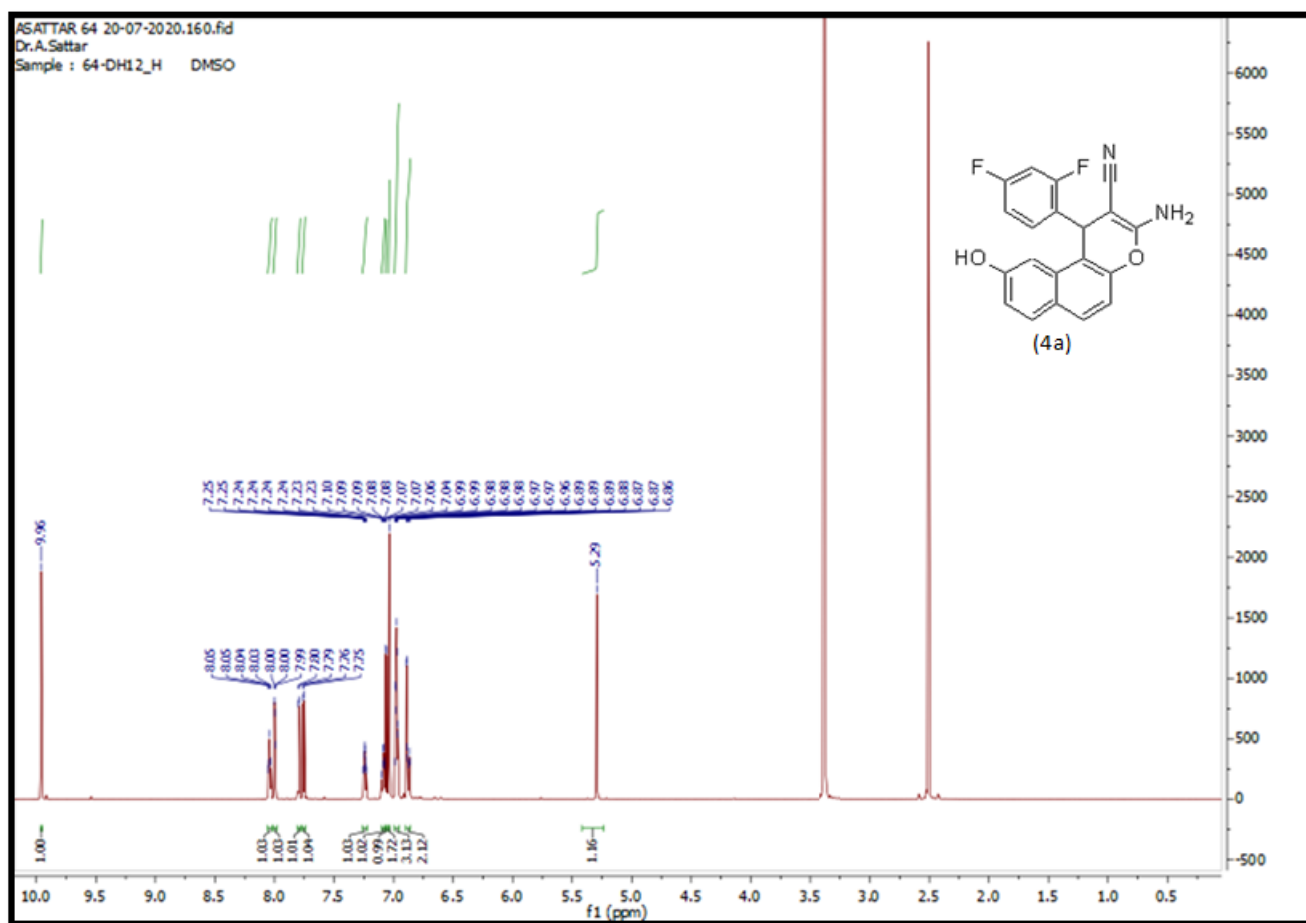

Figure S2:  $^1\text{H}$  NMR of cpd. (4a).

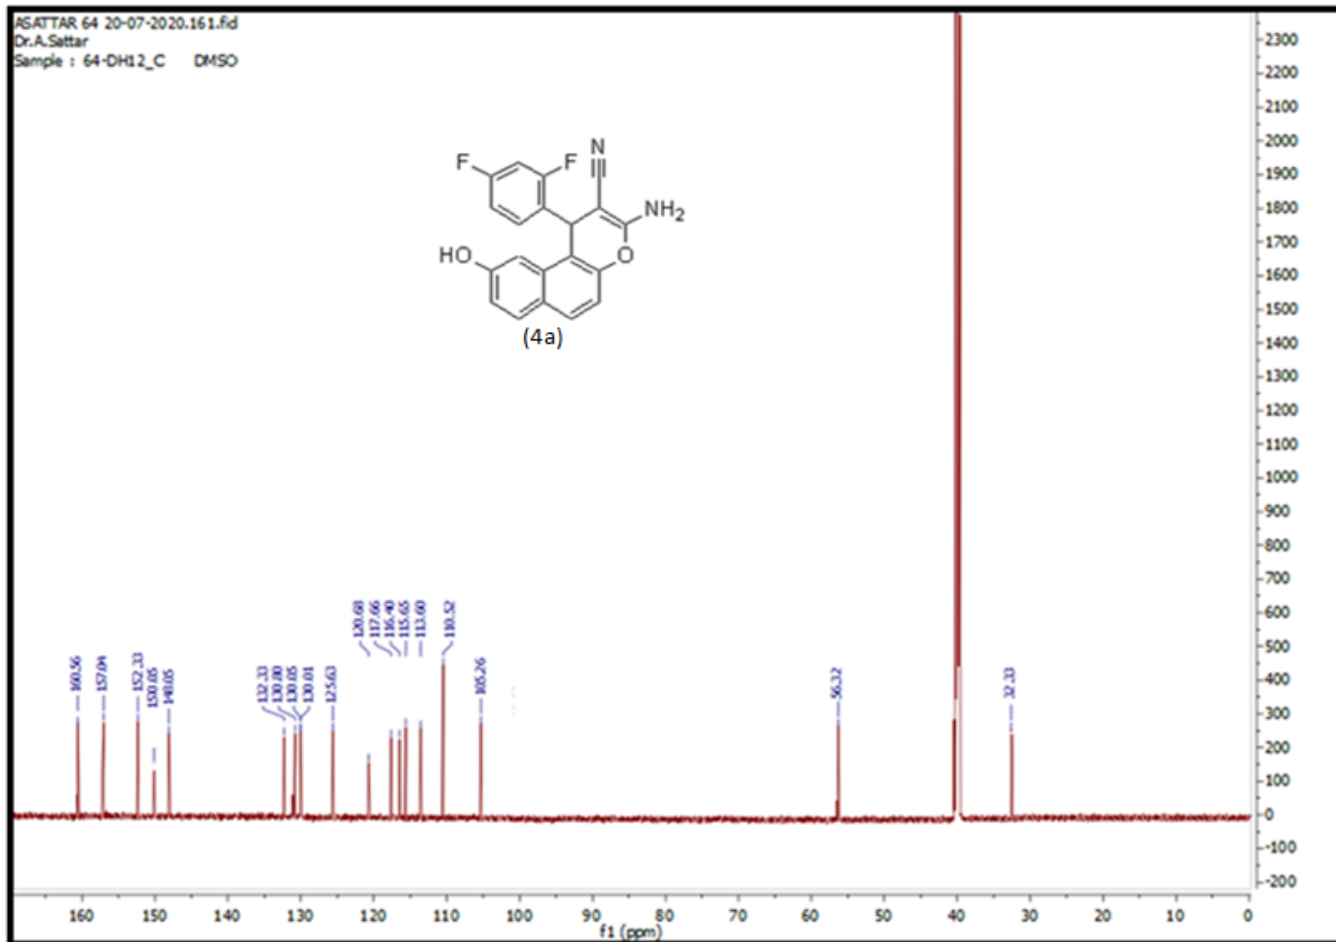

Figure S3: <sup>13</sup>C NMR of cpd. (4a).

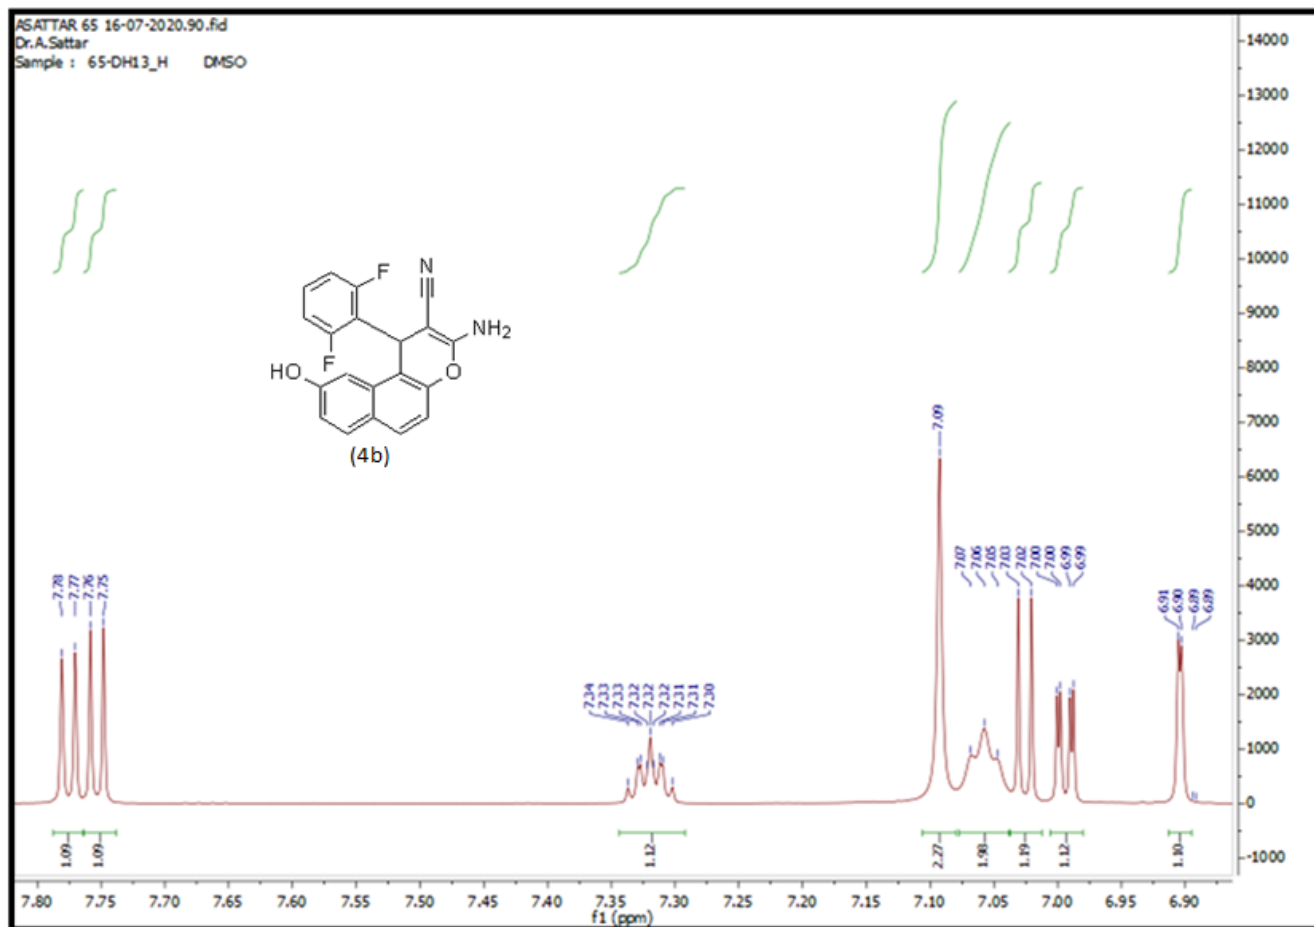

**Figure S4:**  $^1\text{H}$  NMR 8.5-6.5 ppm of cpd. (4b).

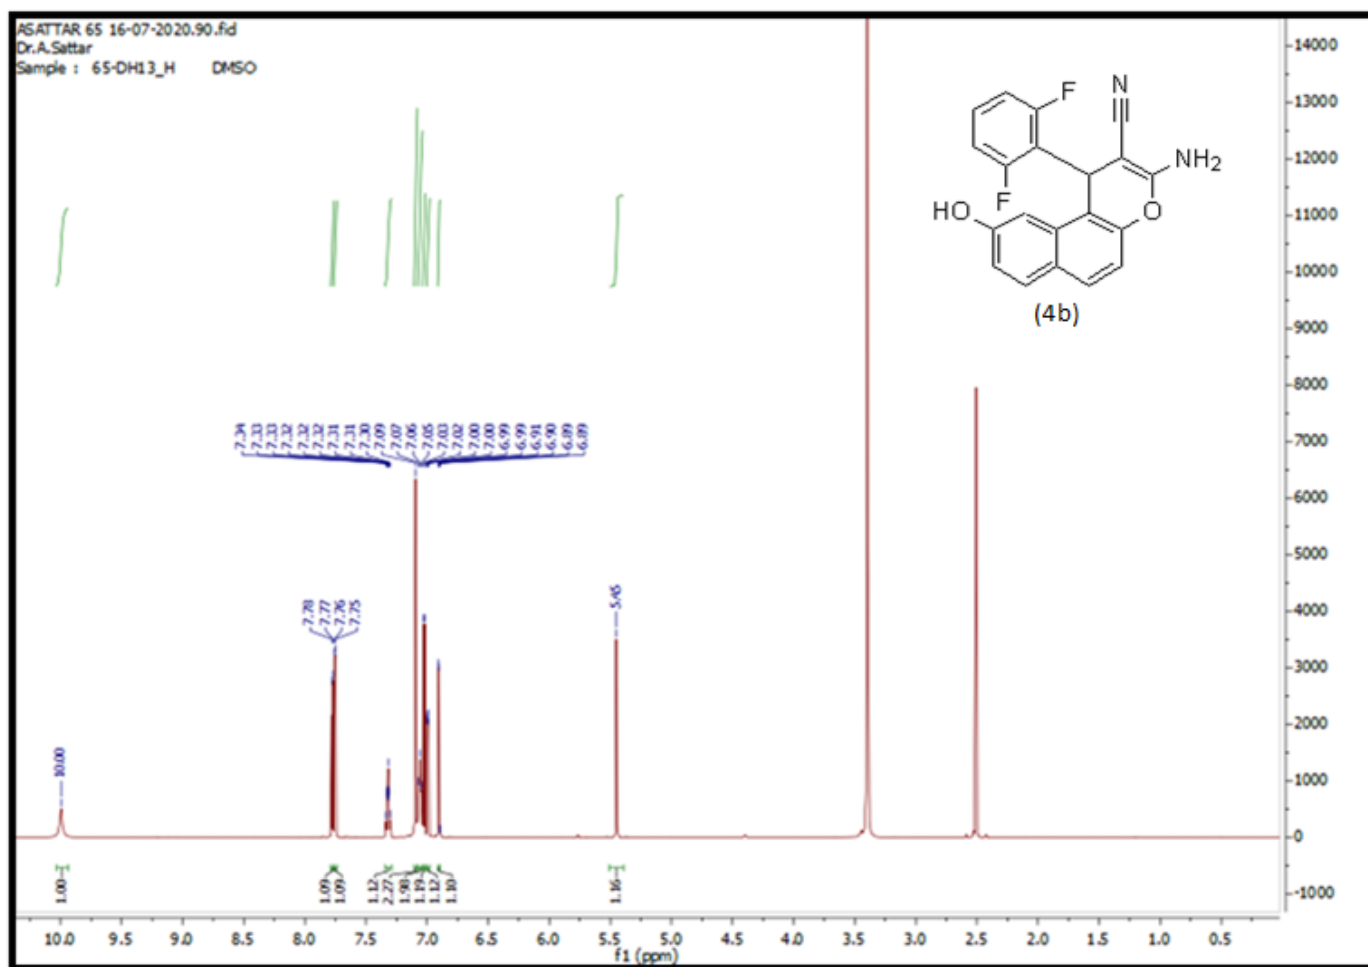

**Figure S5:**  $^1\text{H}$  NMR of cpd. (4b).



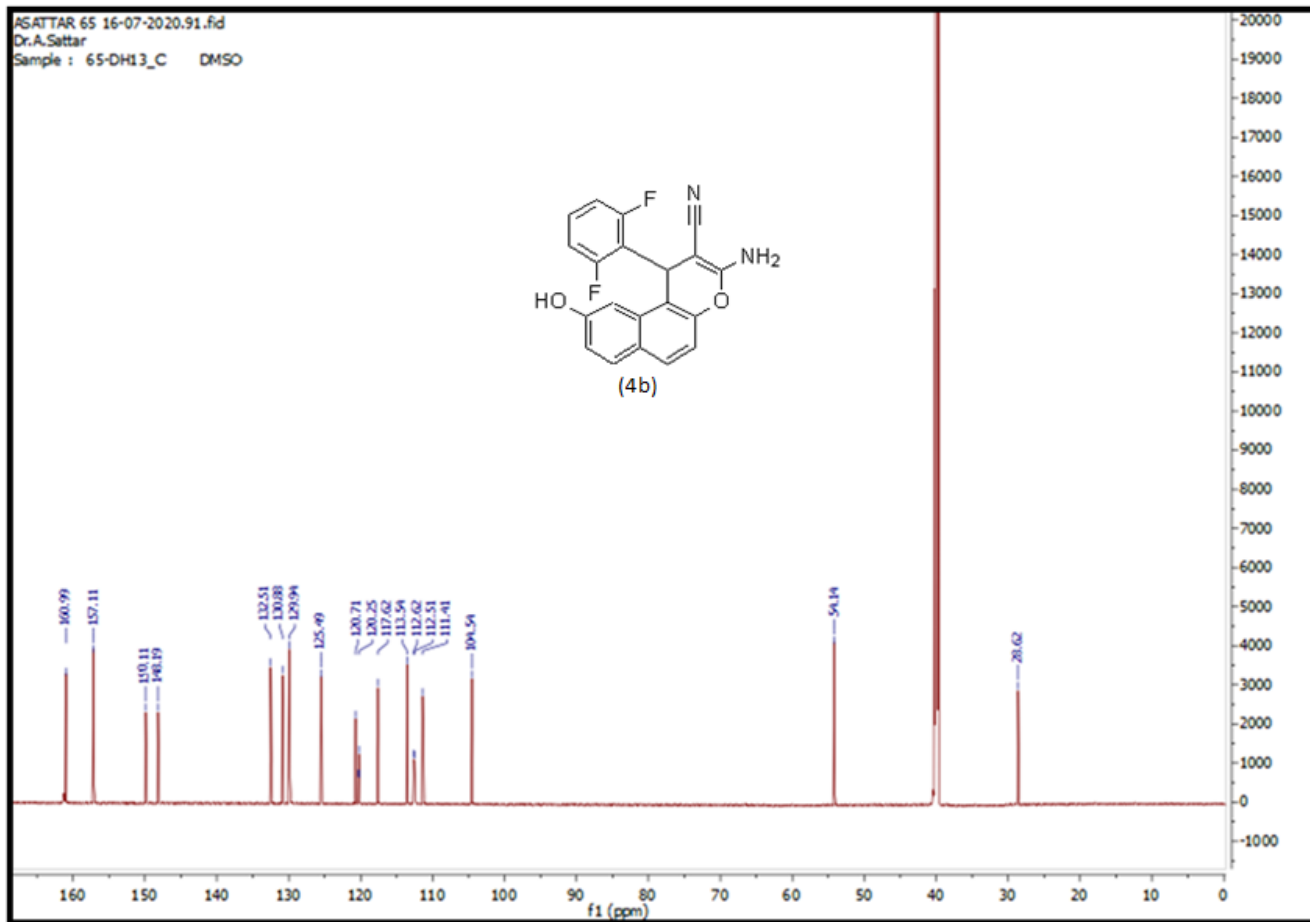

**Figure S6:** <sup>13</sup>C NMR of cpd. (4b).

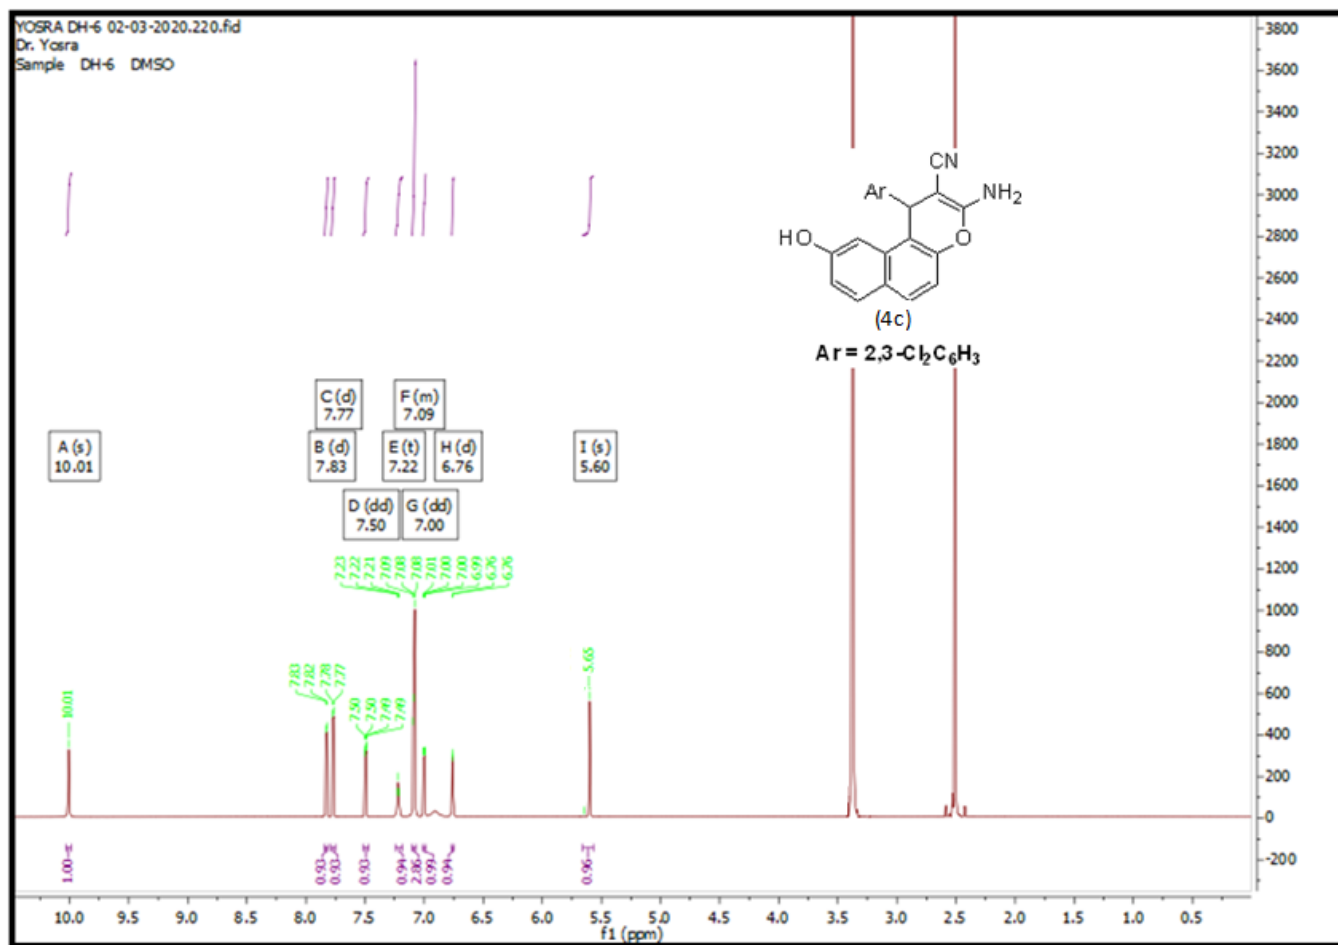

**Figure S7:** <sup>1</sup>H NMR of cpd. (4c).

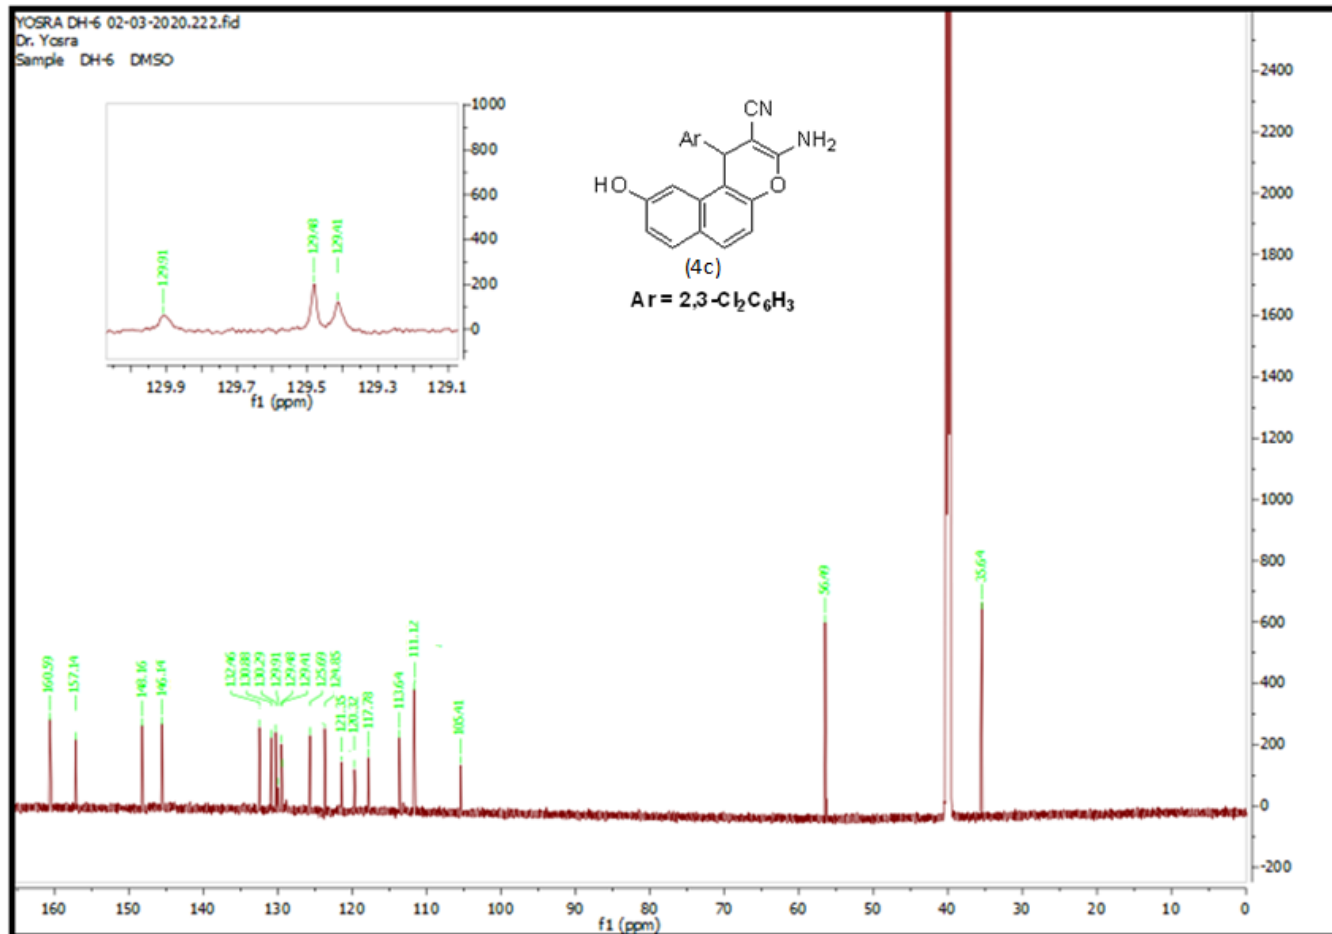

**Figure S8:** <sup>13</sup>C NMR of cpd. (4c).

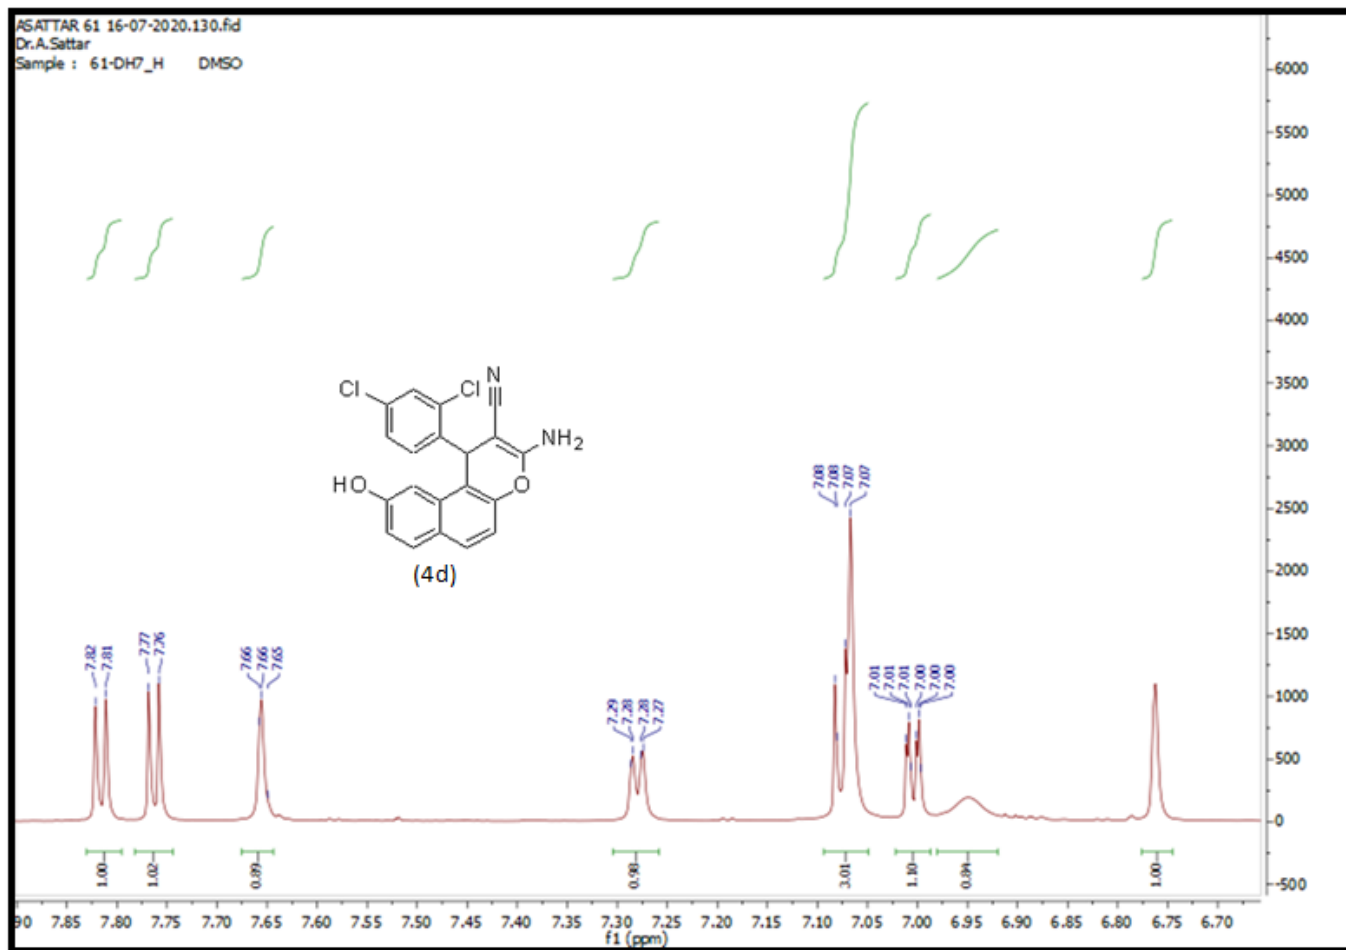

**Figure S9:**  $^1\text{H}$  NMR 8.5-6.5 ppm of cpd. (4d).



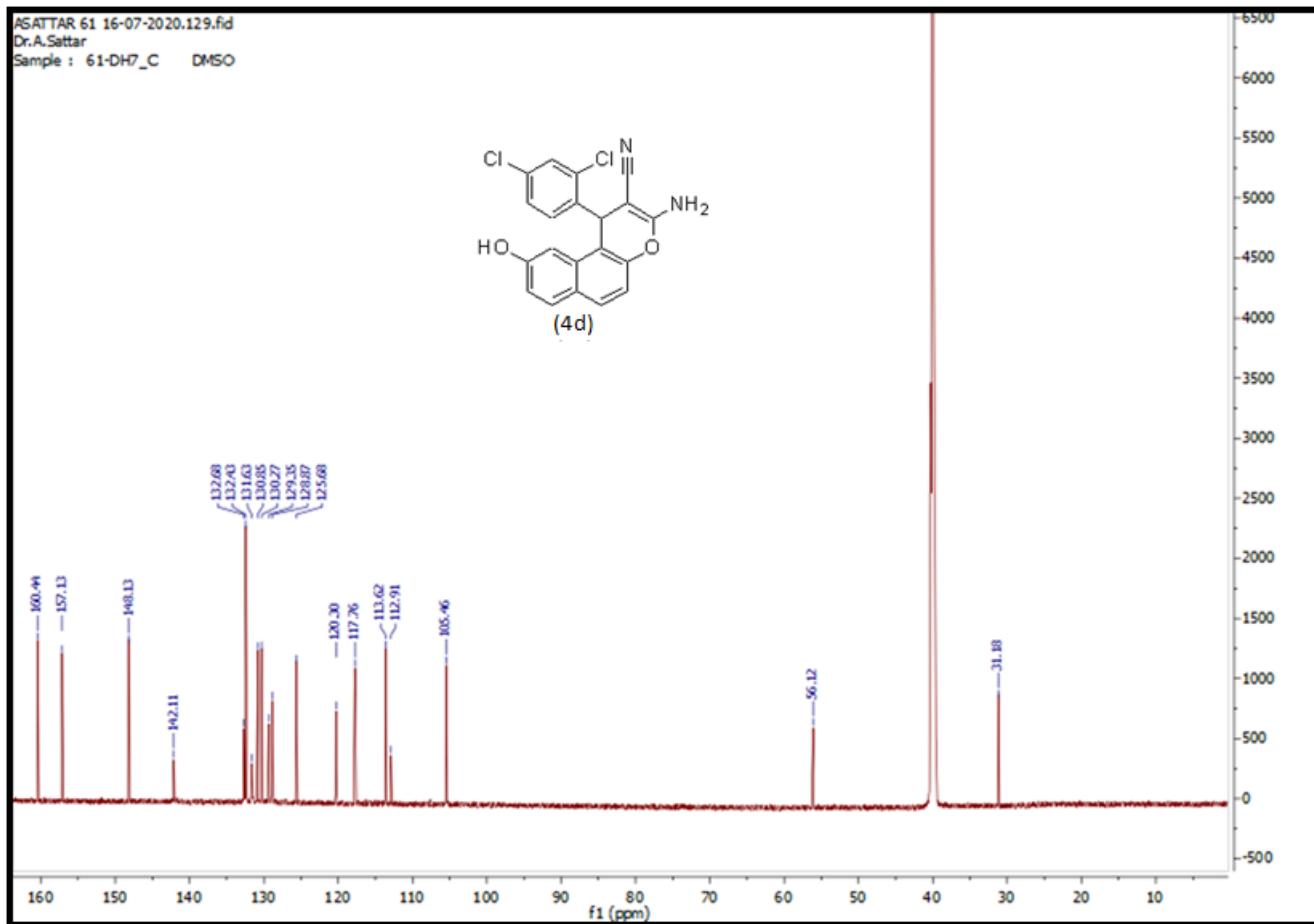

**Figure S11:**  $^{13}\text{C}$  NMR of cpd. (4d).

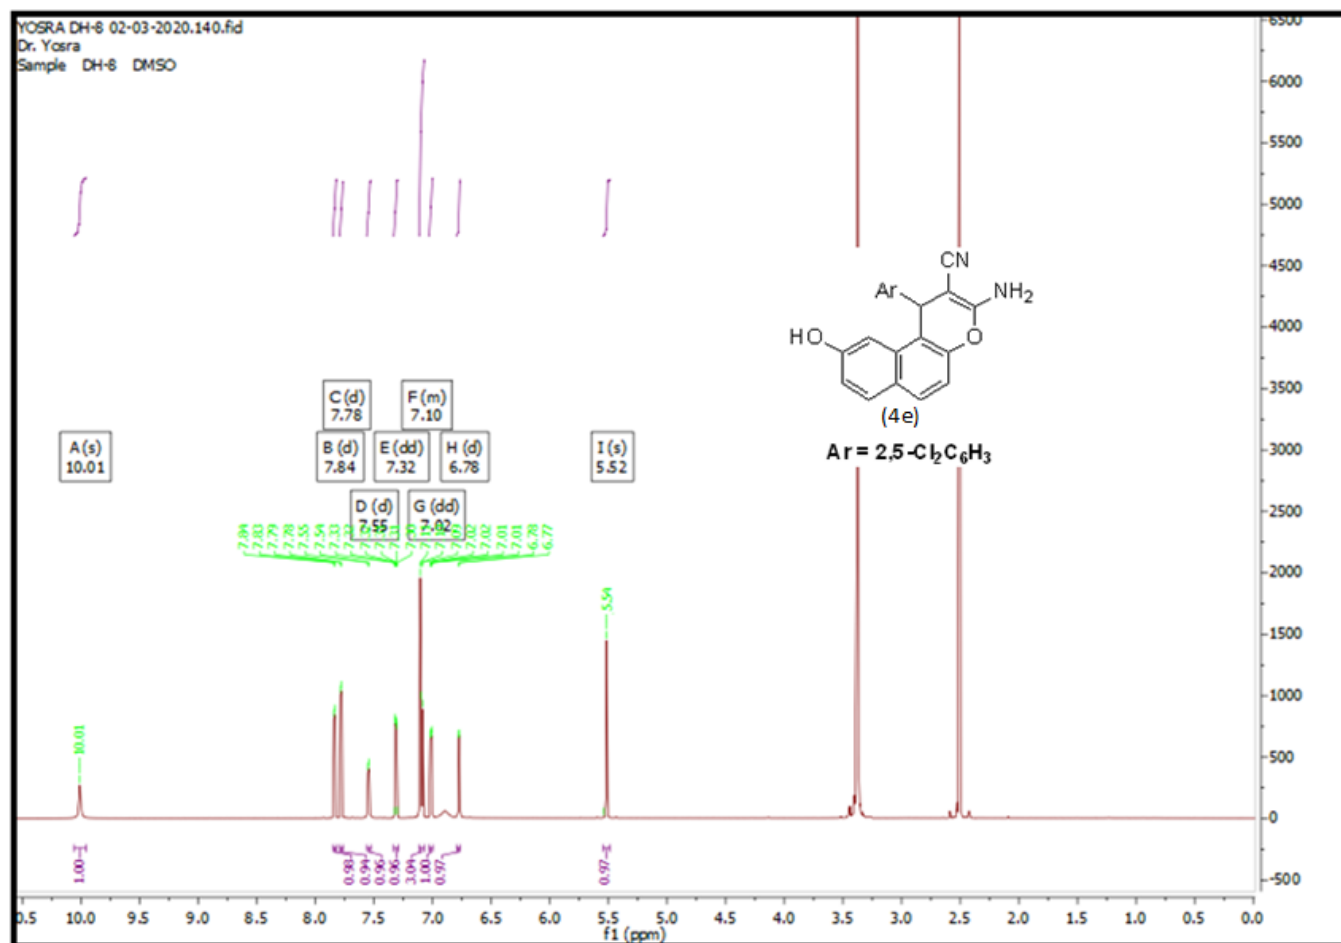

Figure S12: <sup>1</sup>H NMR of cpd (4e).

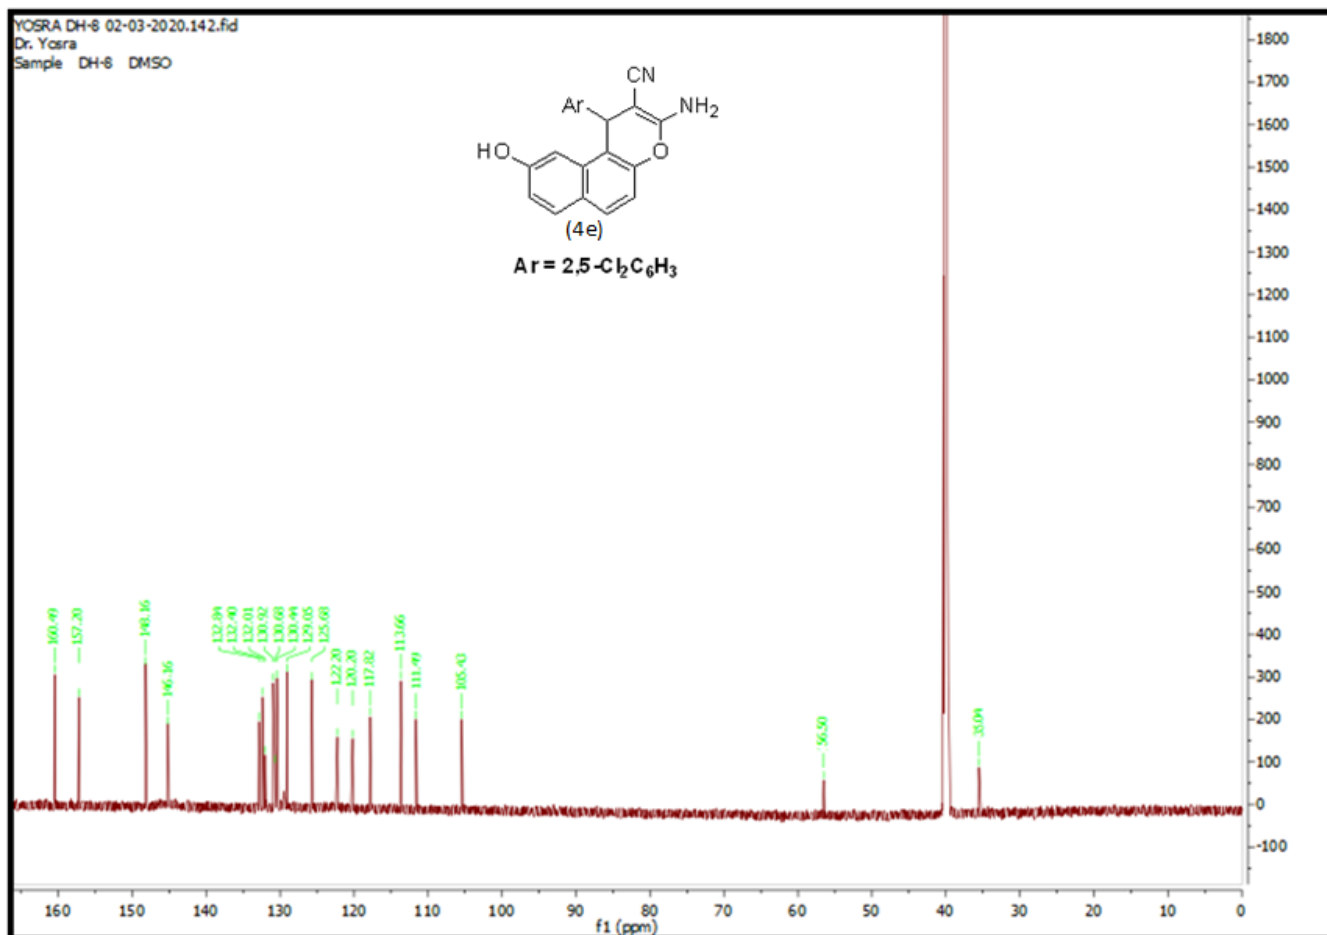

**Figure S13:** <sup>13</sup>C NMR of cpd. (4e).



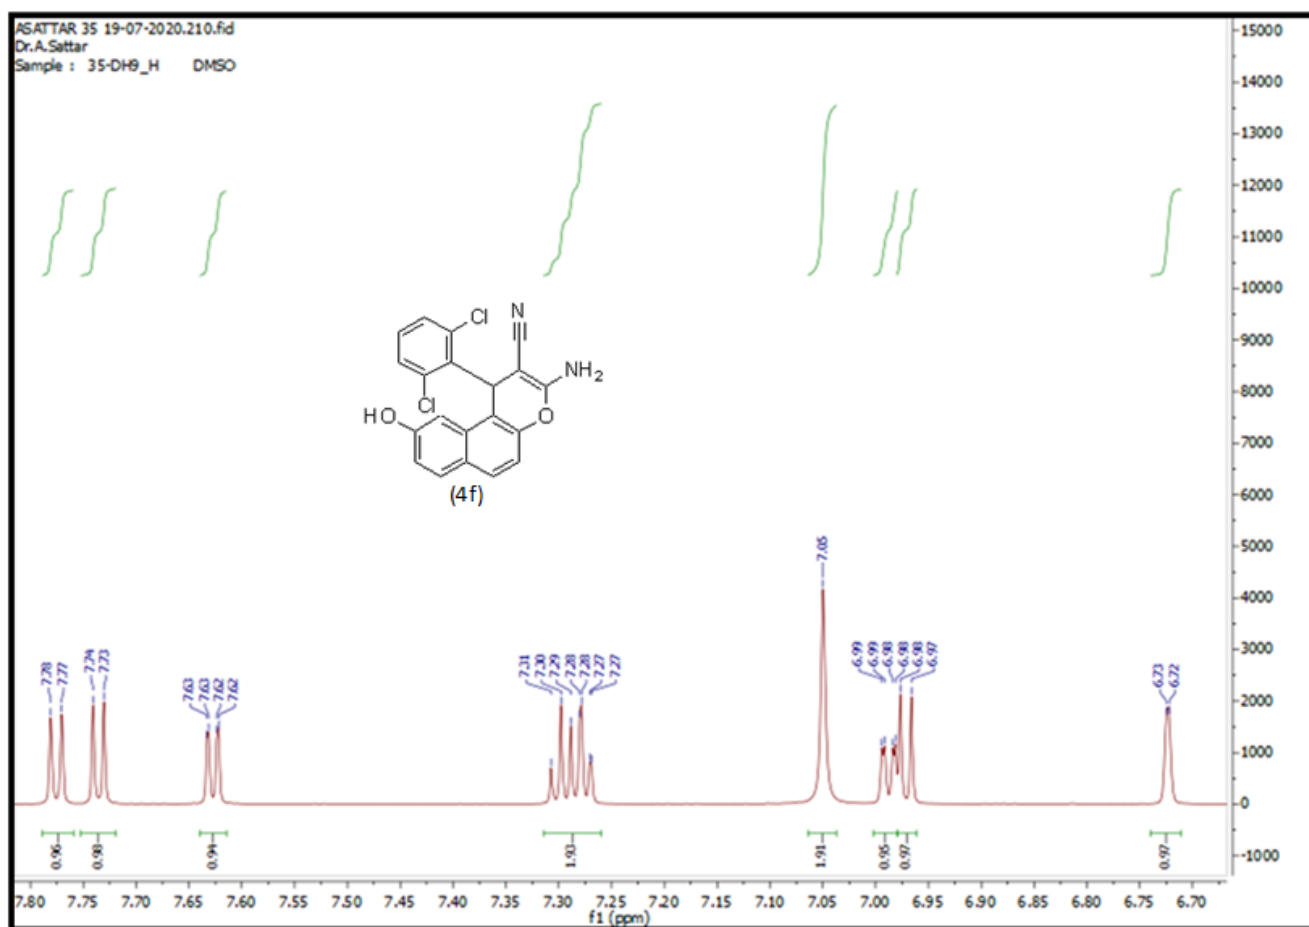

**Figure S14:** <sup>1</sup>H NMR 8.5-6.5 ppm of cpd. (4f).

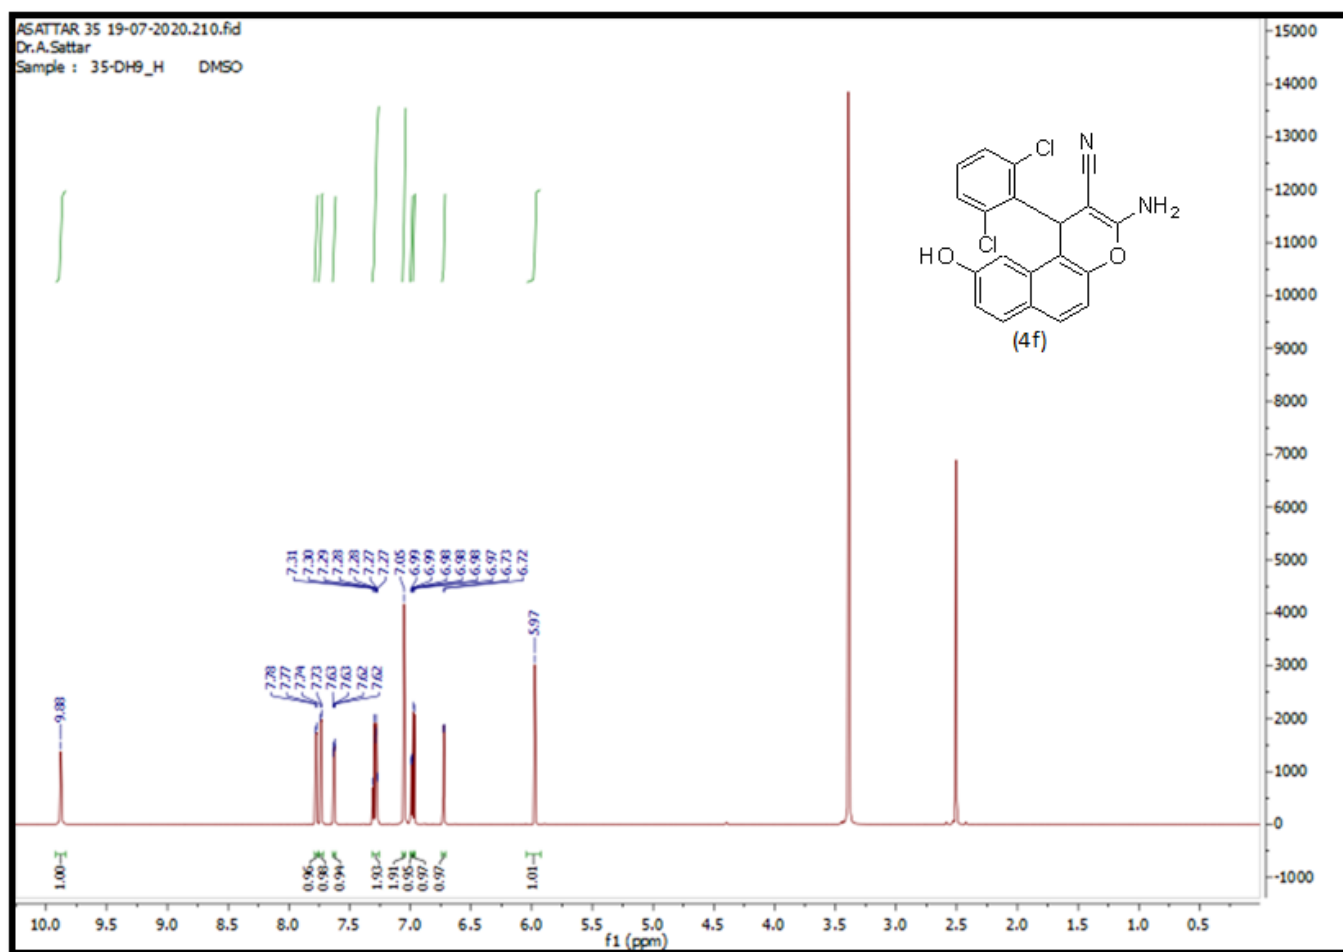

**Figure S15:**  $^1\text{H}$  NMR of cpd. (4f).

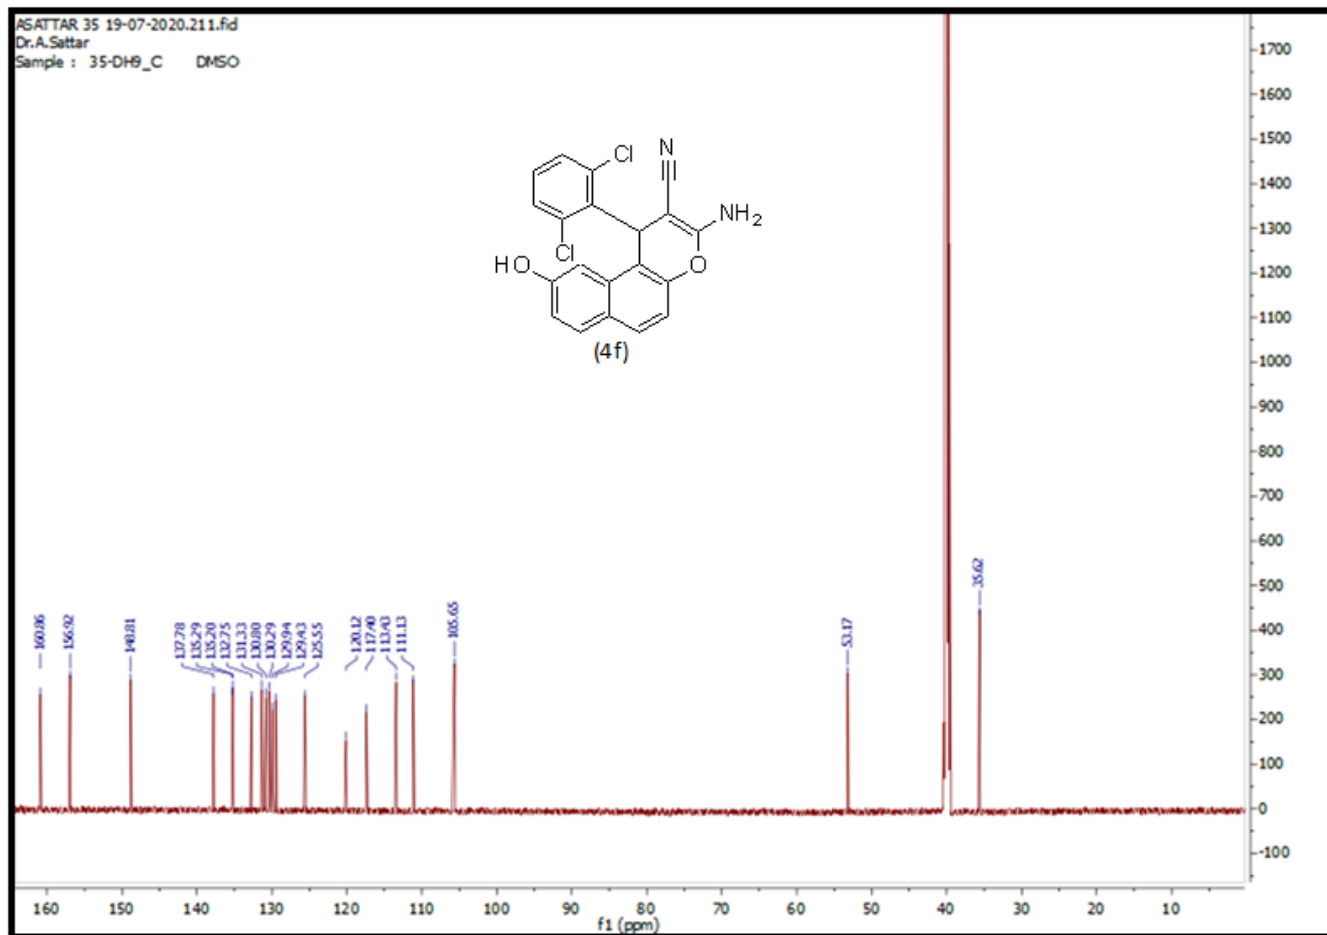

**Figure S16:** <sup>13</sup>C NMR of cpd. (4f).

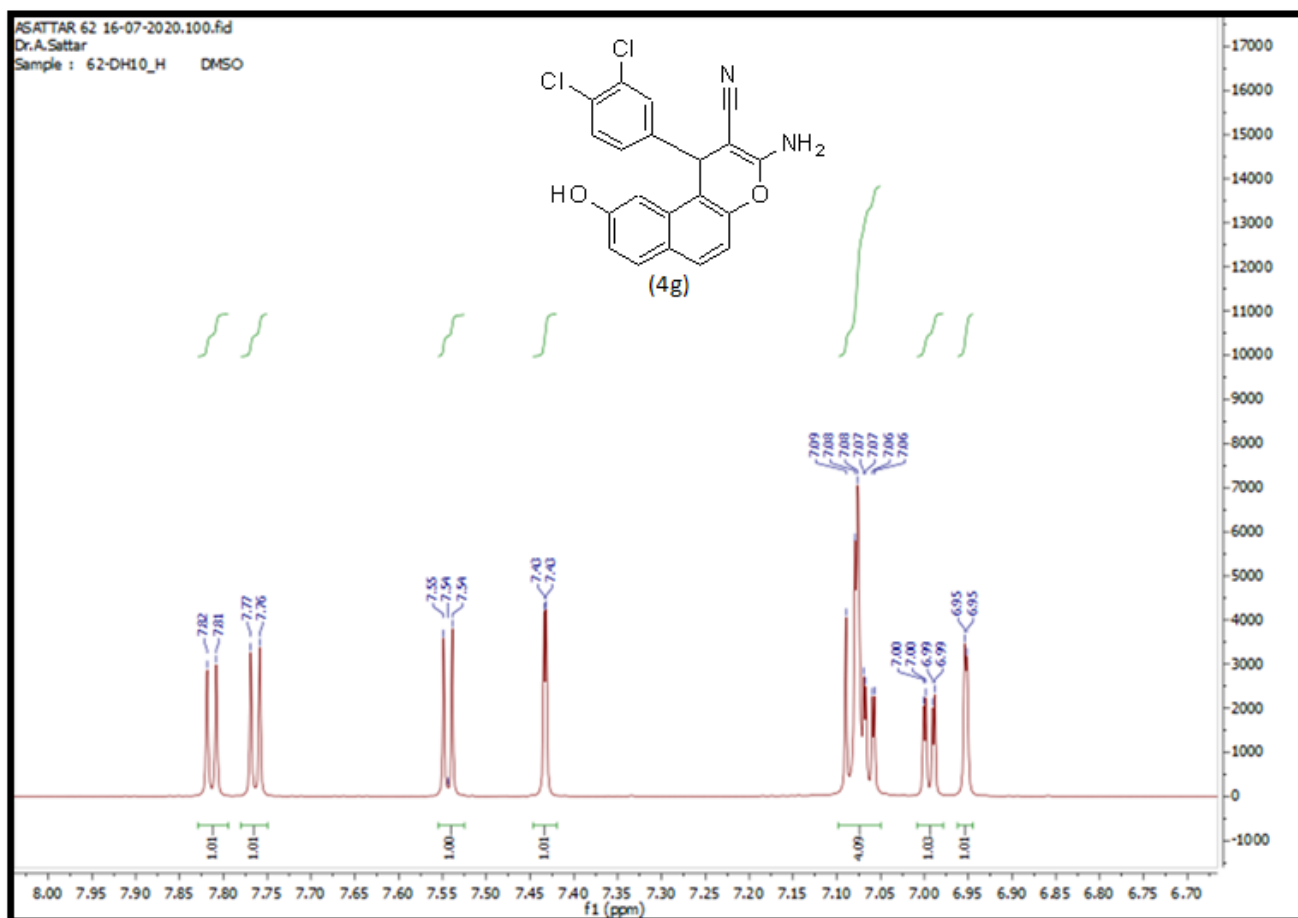

Figure S17:  $^1\text{H}$  NMR 8.5-6.5 ppm of cpd. (4g).

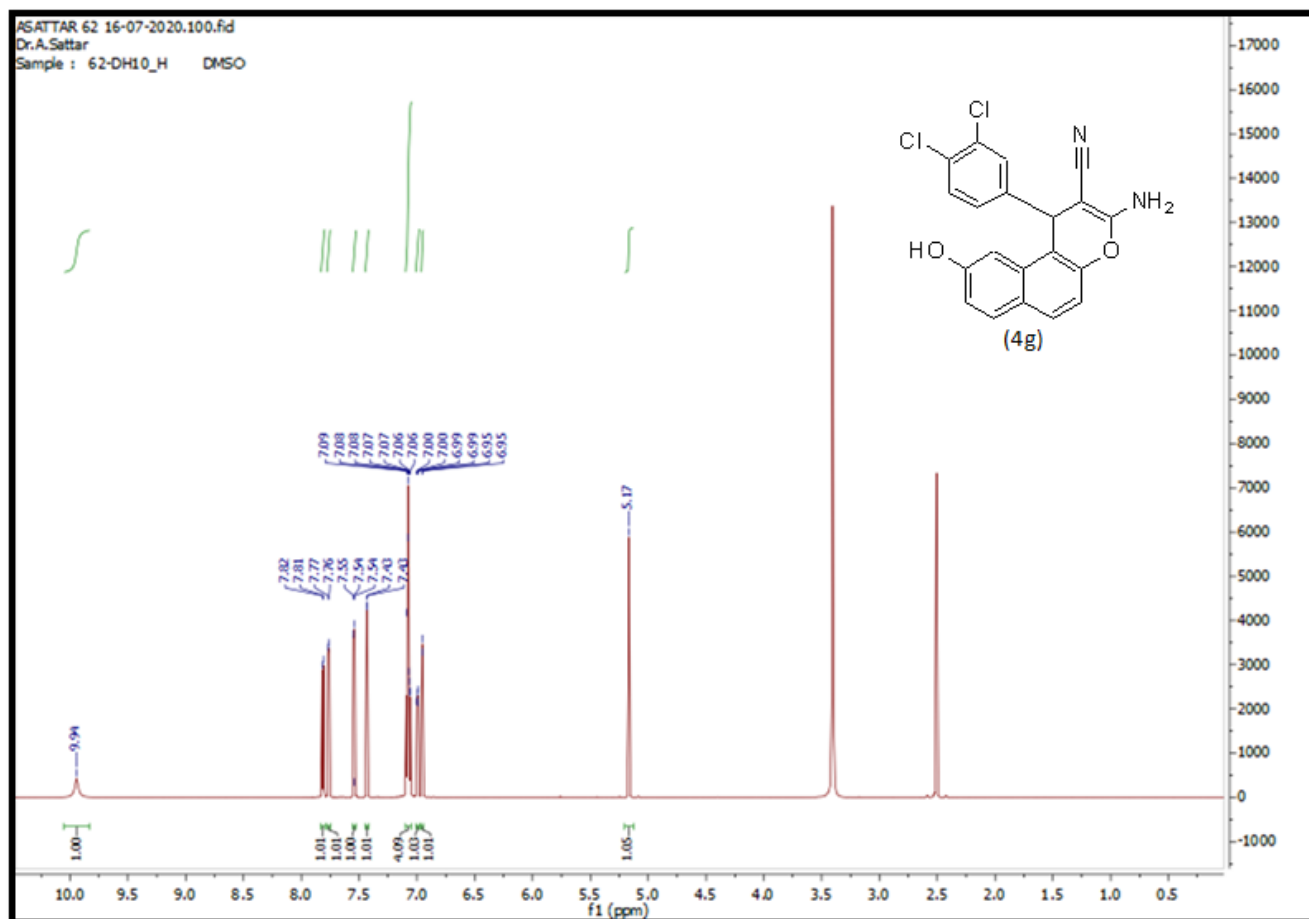

Figure S18:  $^1\text{H}$  NMR of cpd. (4g).

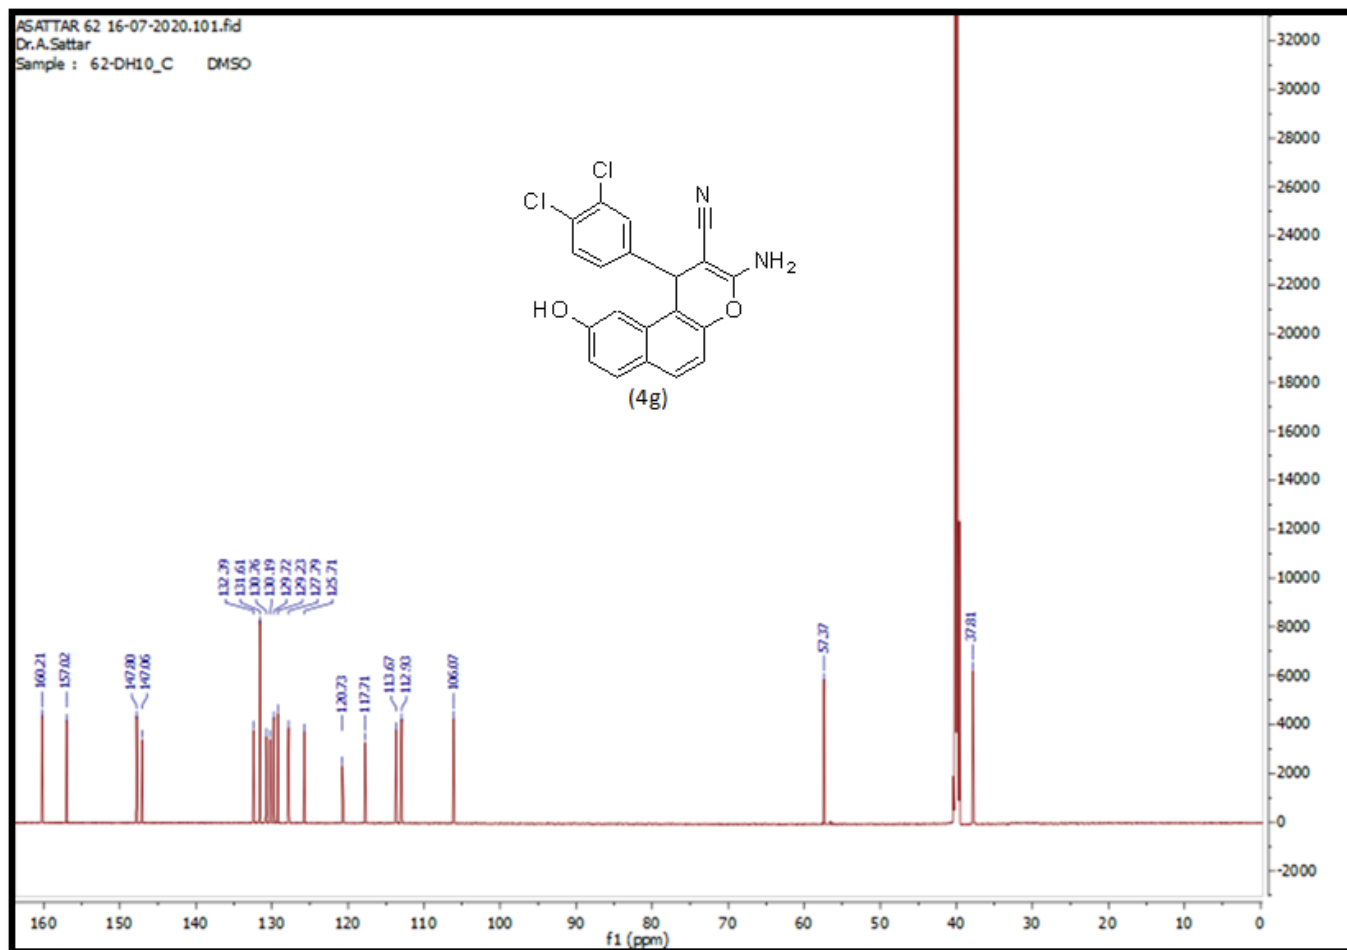

**Figure S19:**  $^{13}\text{C}$  NMR of cpd. (4g).

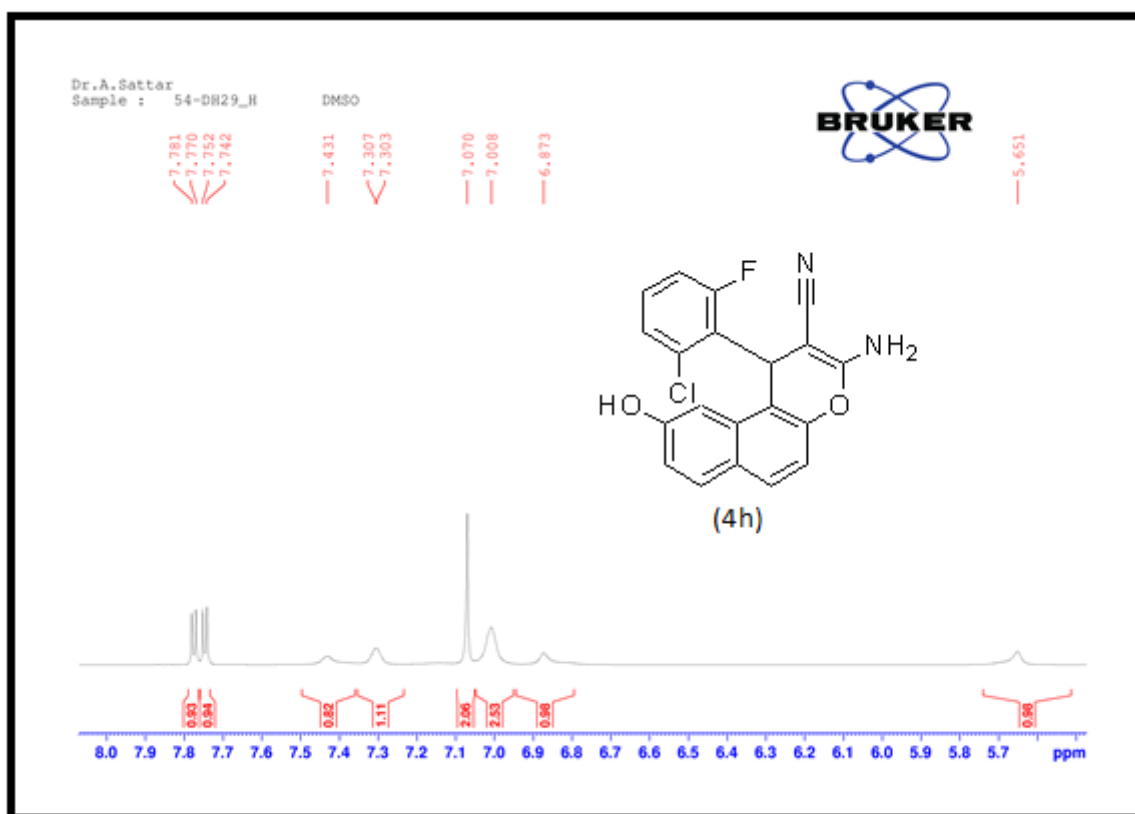

**Figure S20:**  $^1\text{H}$  NMR 8.5-6.5 ppm of cpd. (4h).

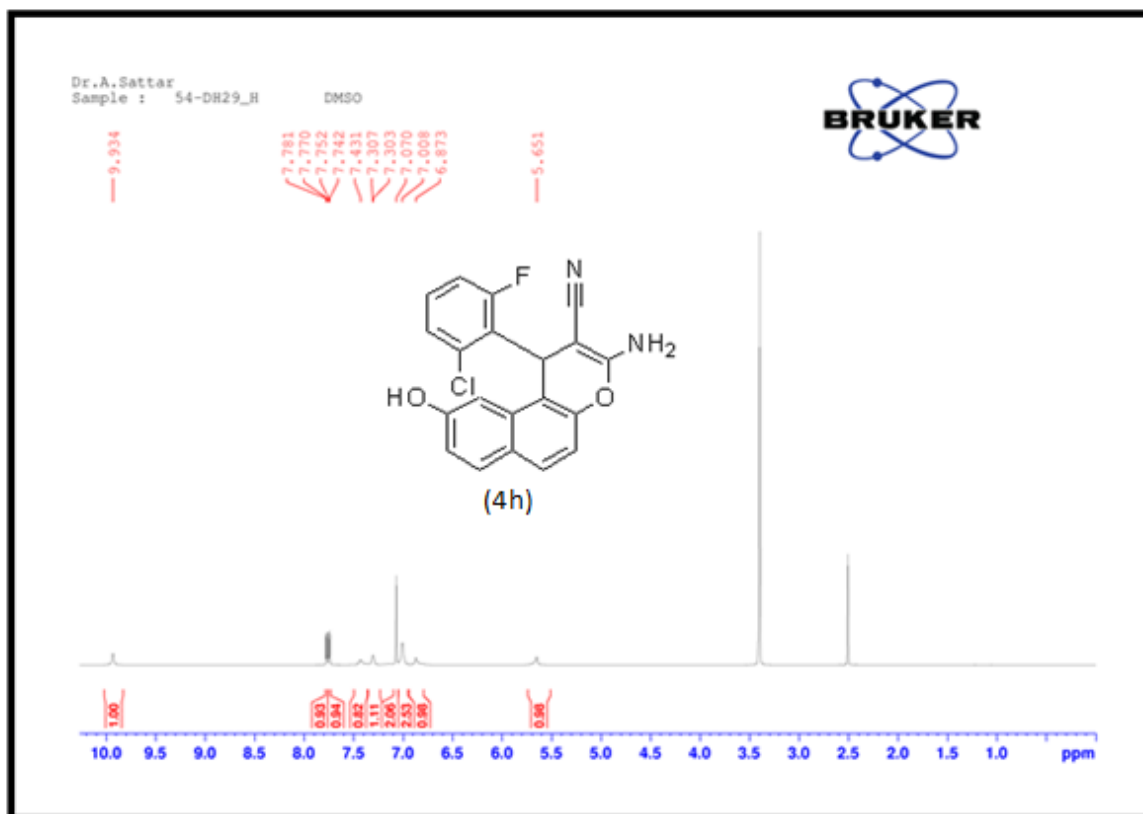

**Figure S21:**  $^1\text{H}$  NMR of cpd. (4h).





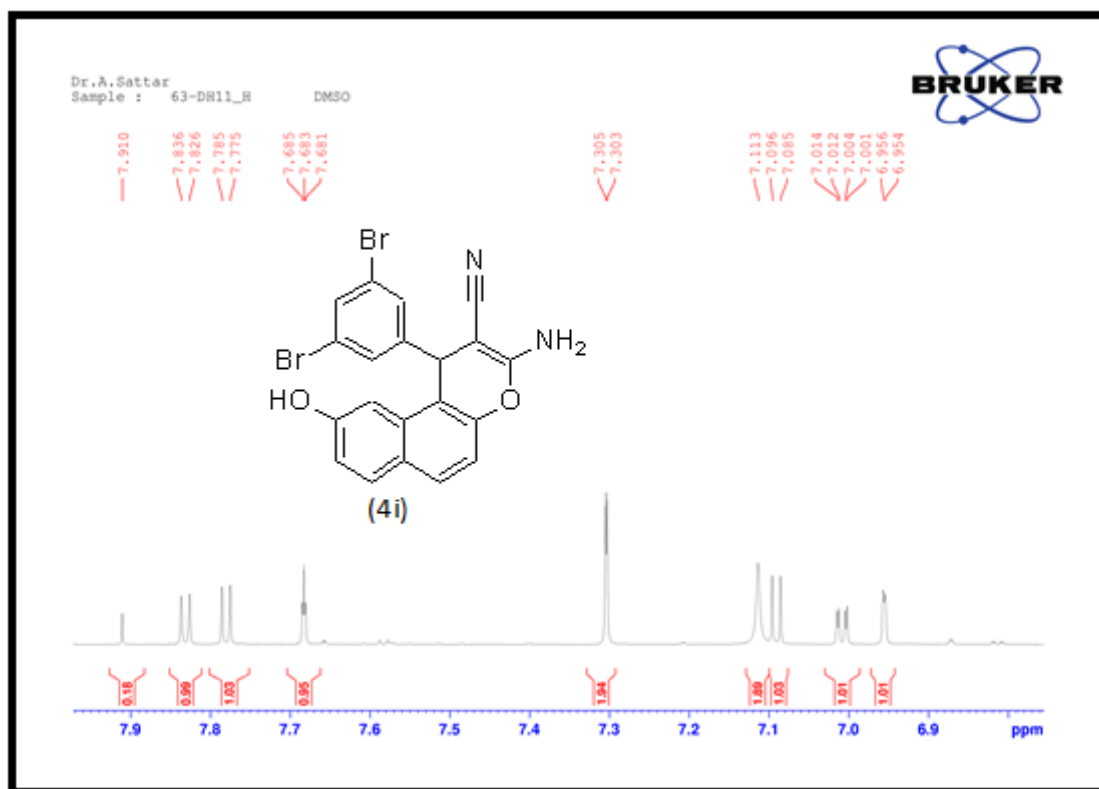

Figure S23:  $^1\text{H}$  NMR 8.5-6.5 ppm of cpd. (4i).

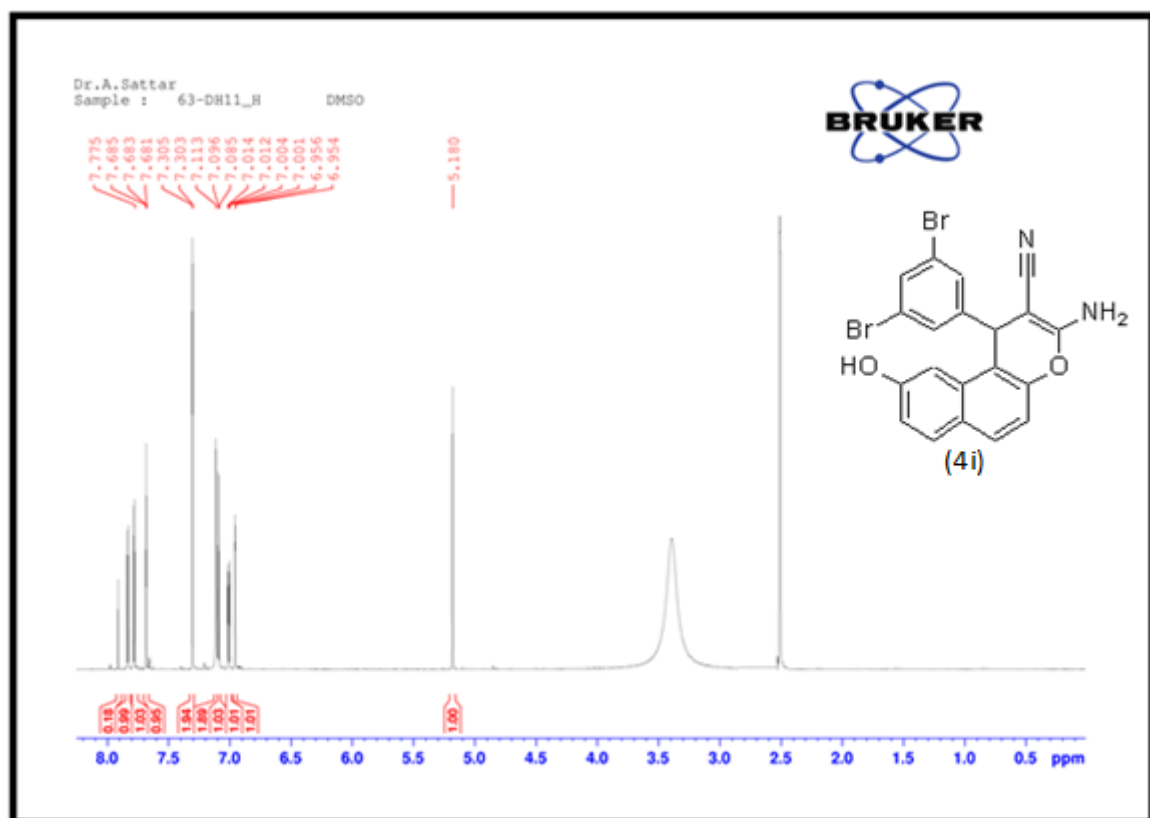

Figure S24: <sup>1</sup>H NMR of cpd. (4i).

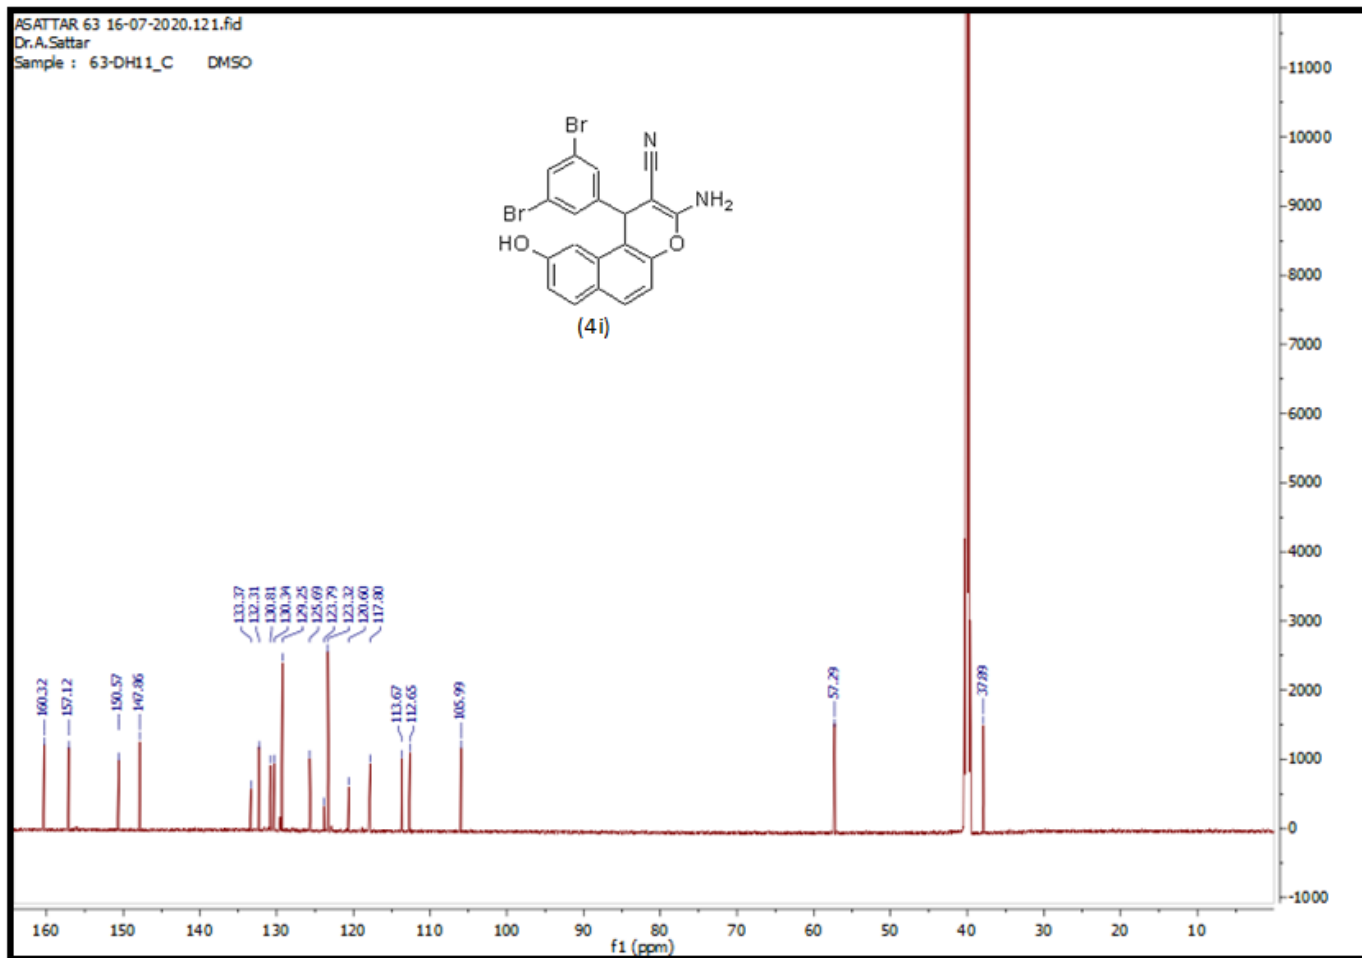

**Figure S25:**  $^{13}\text{C}$  NMR of cpd. (4i).

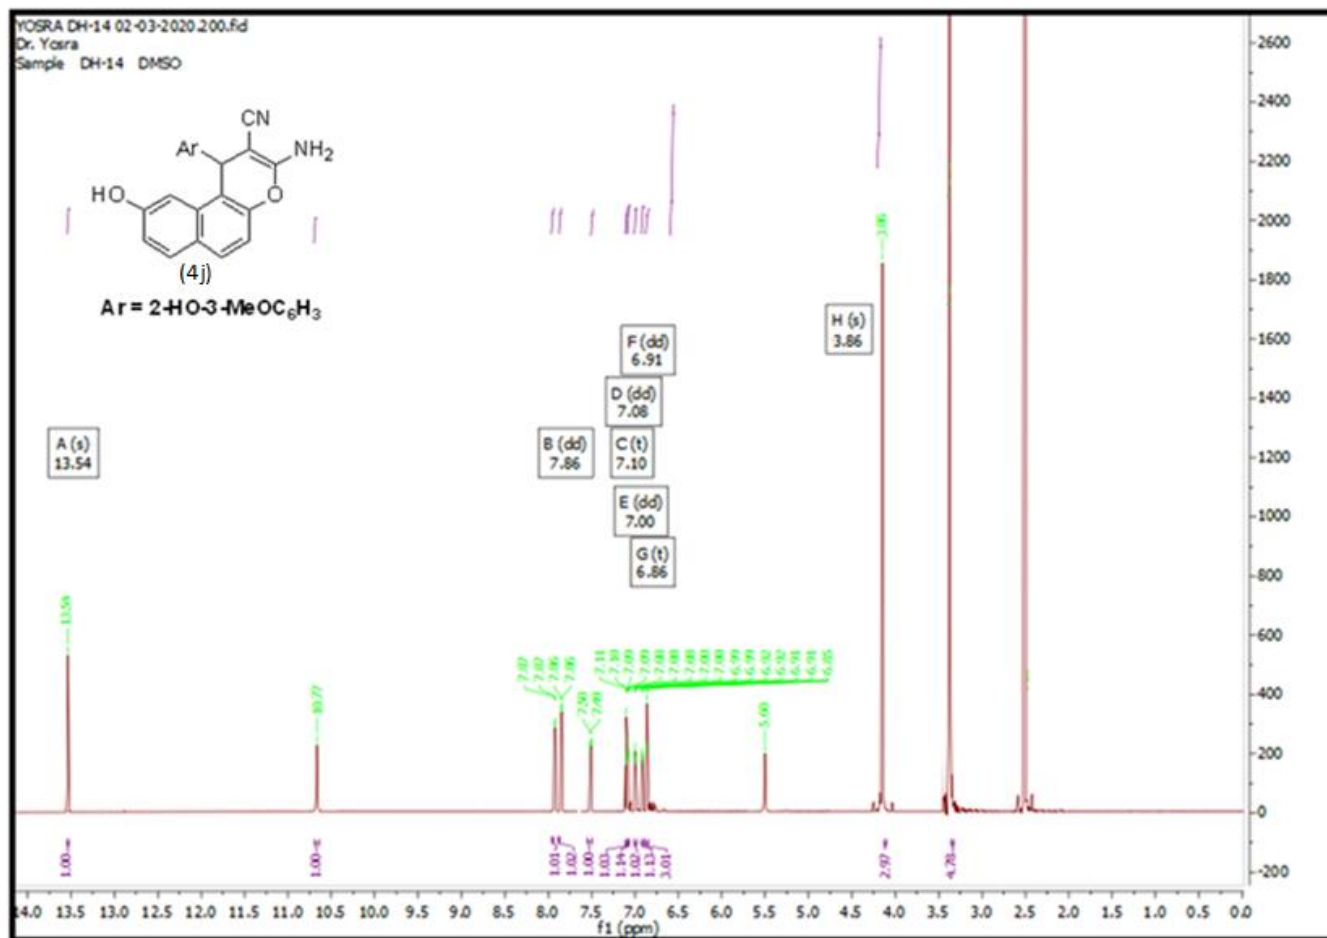

Figure S26: <sup>1</sup>H NMR of cpd. (4j).

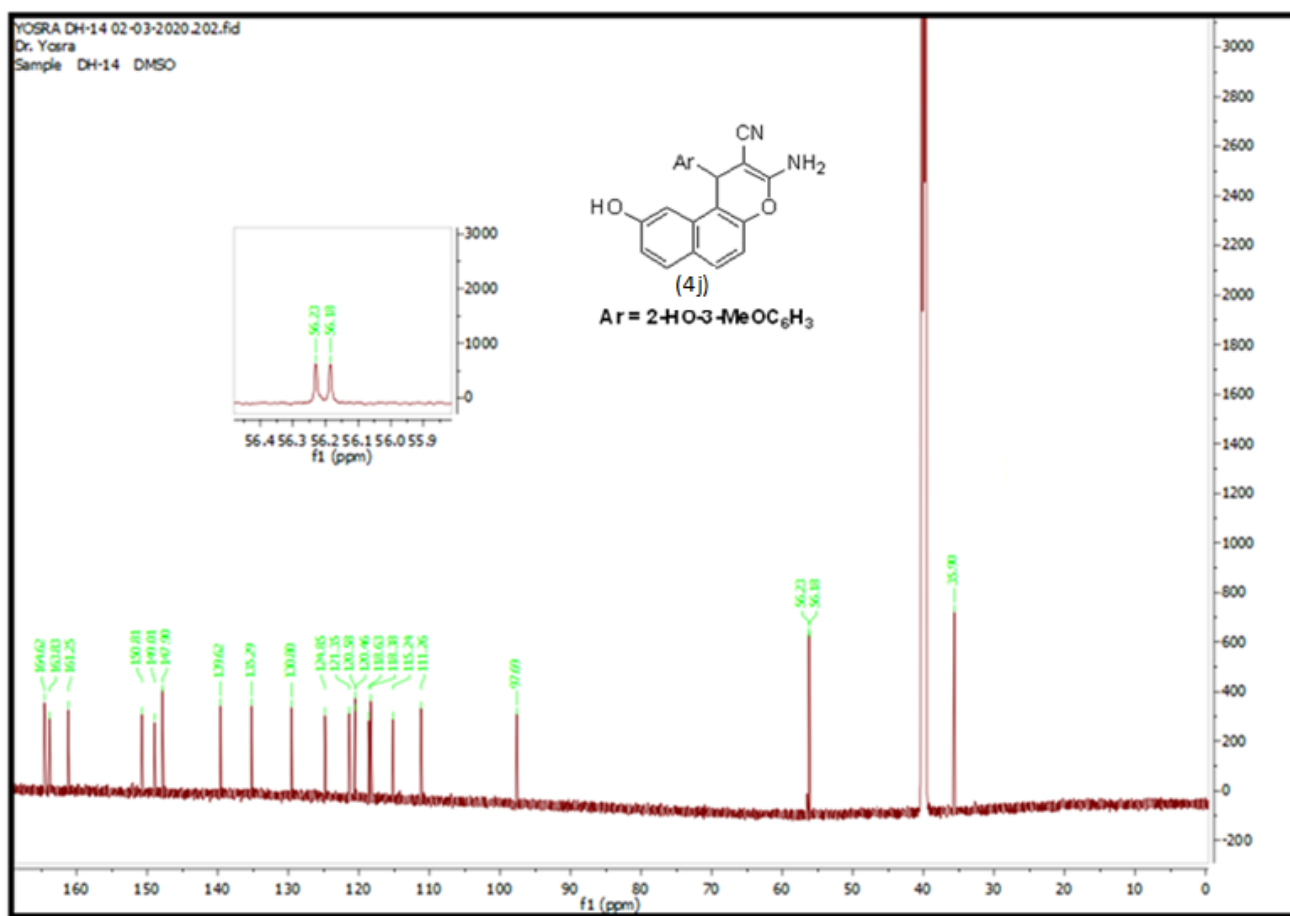

**Figure S27:** <sup>13</sup>C NMR of cpd. (4j).

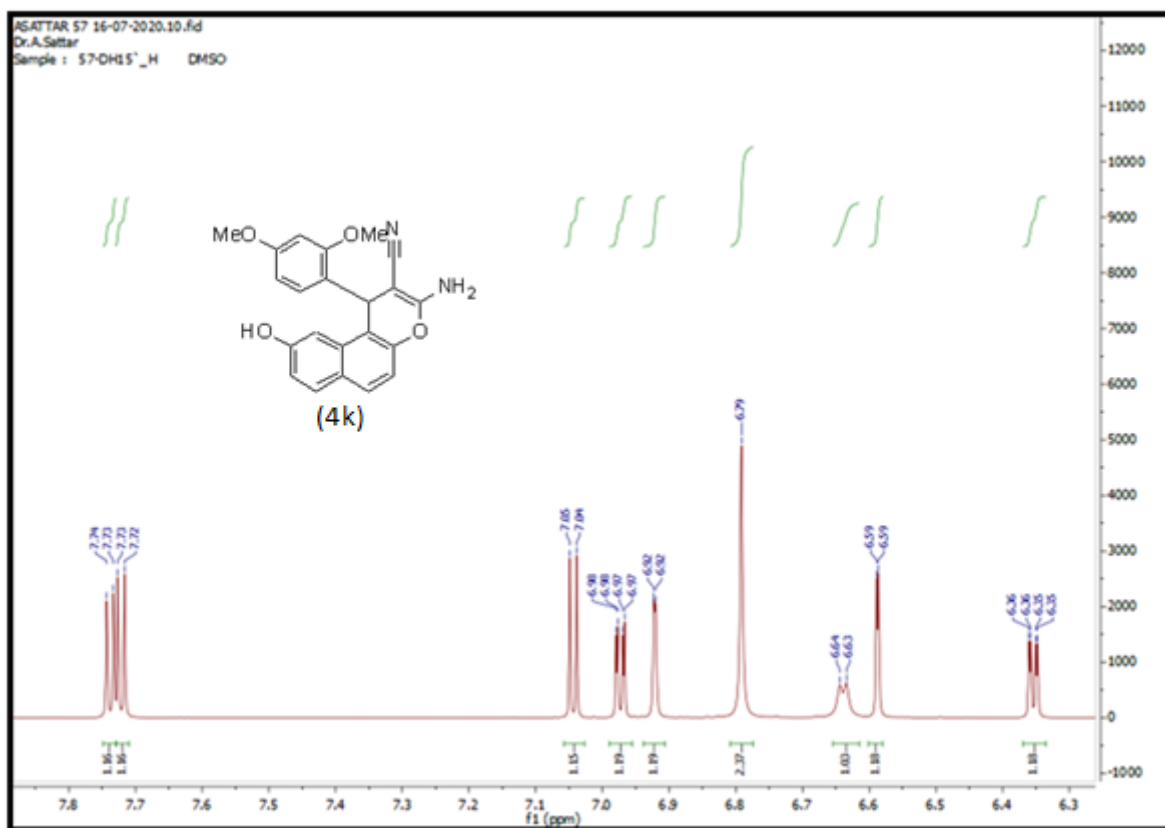

**Figure S28:** <sup>1</sup>H NMR 8.5-6.5 ppm of cpd. (4k).

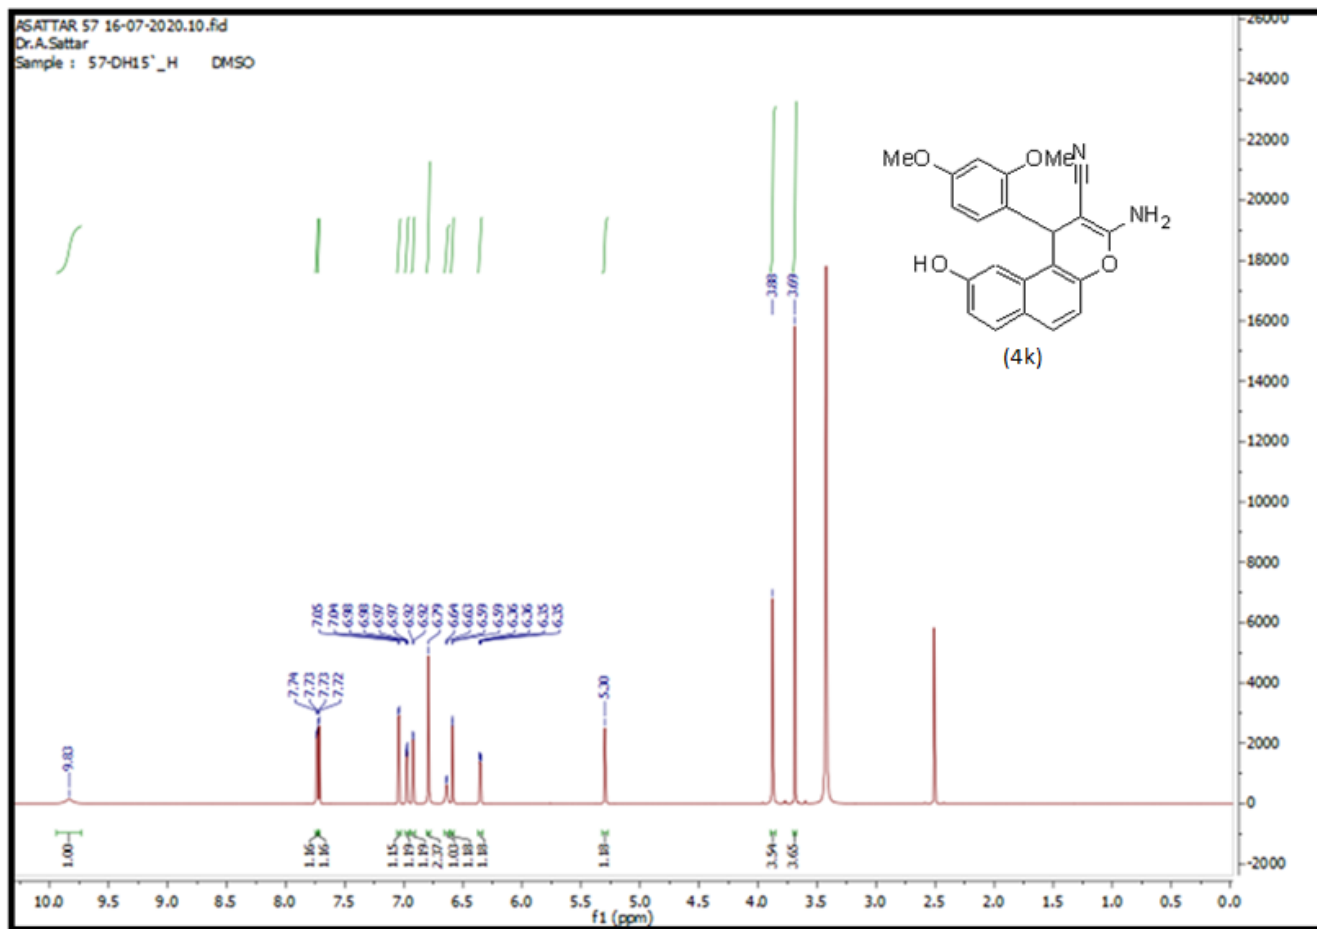

Figure S29:  $^1\text{H}$  NMR of cpd. (4k).



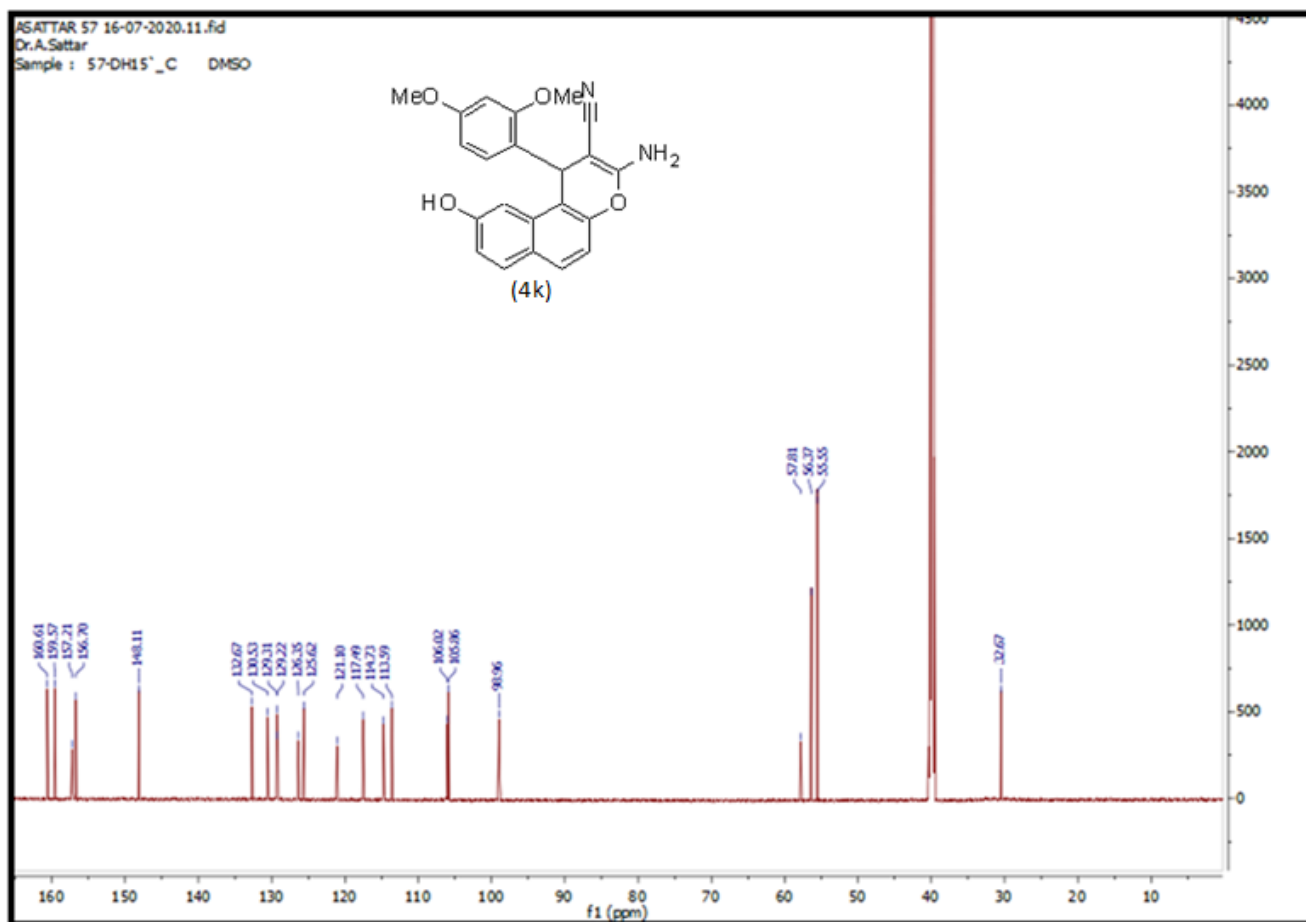

**Figure S30:** <sup>13</sup>C NMR of cpd. (4k).

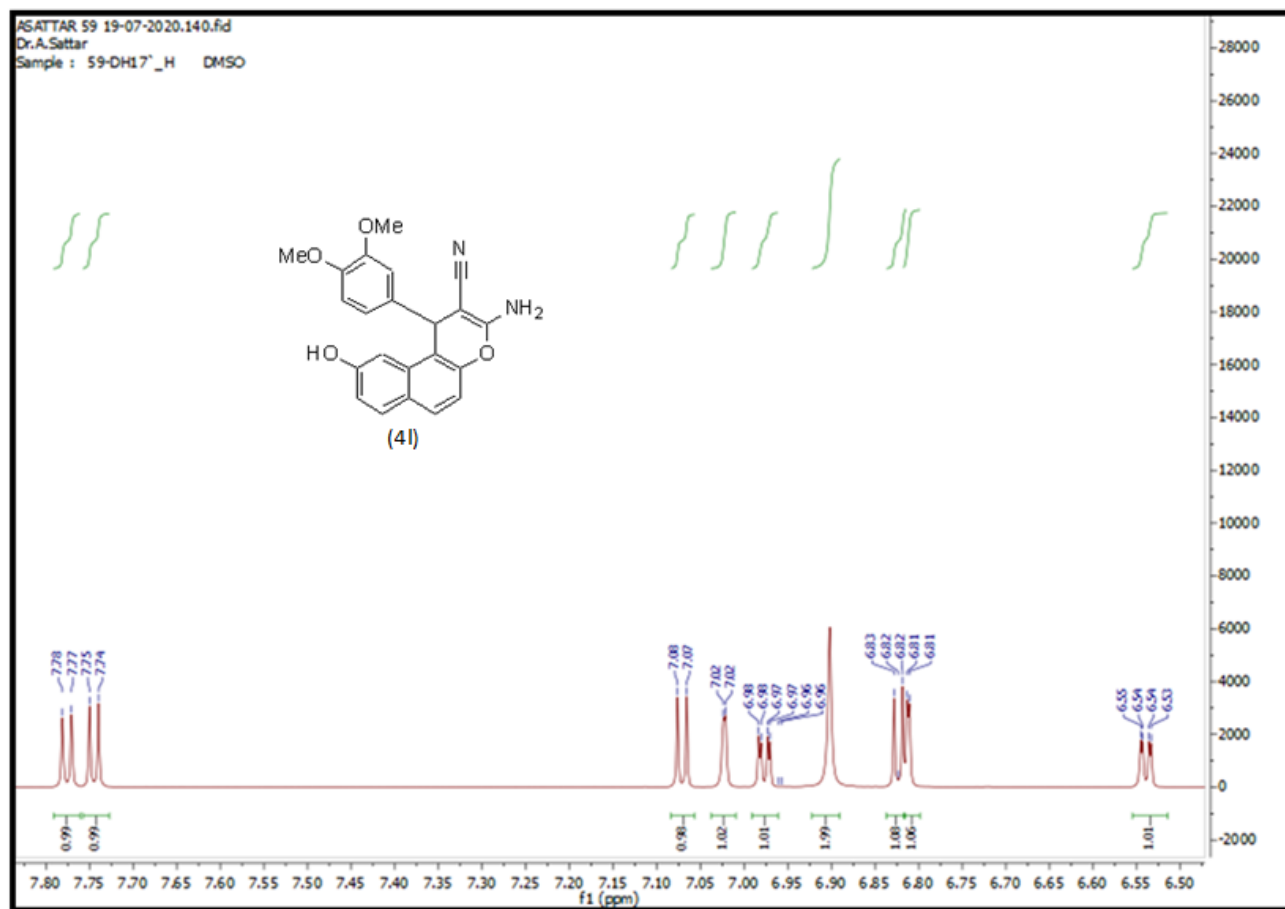

**Figure S31:**  $^1\text{H}$  NMR 8.5-6.5 ppm of cpd. (4I).



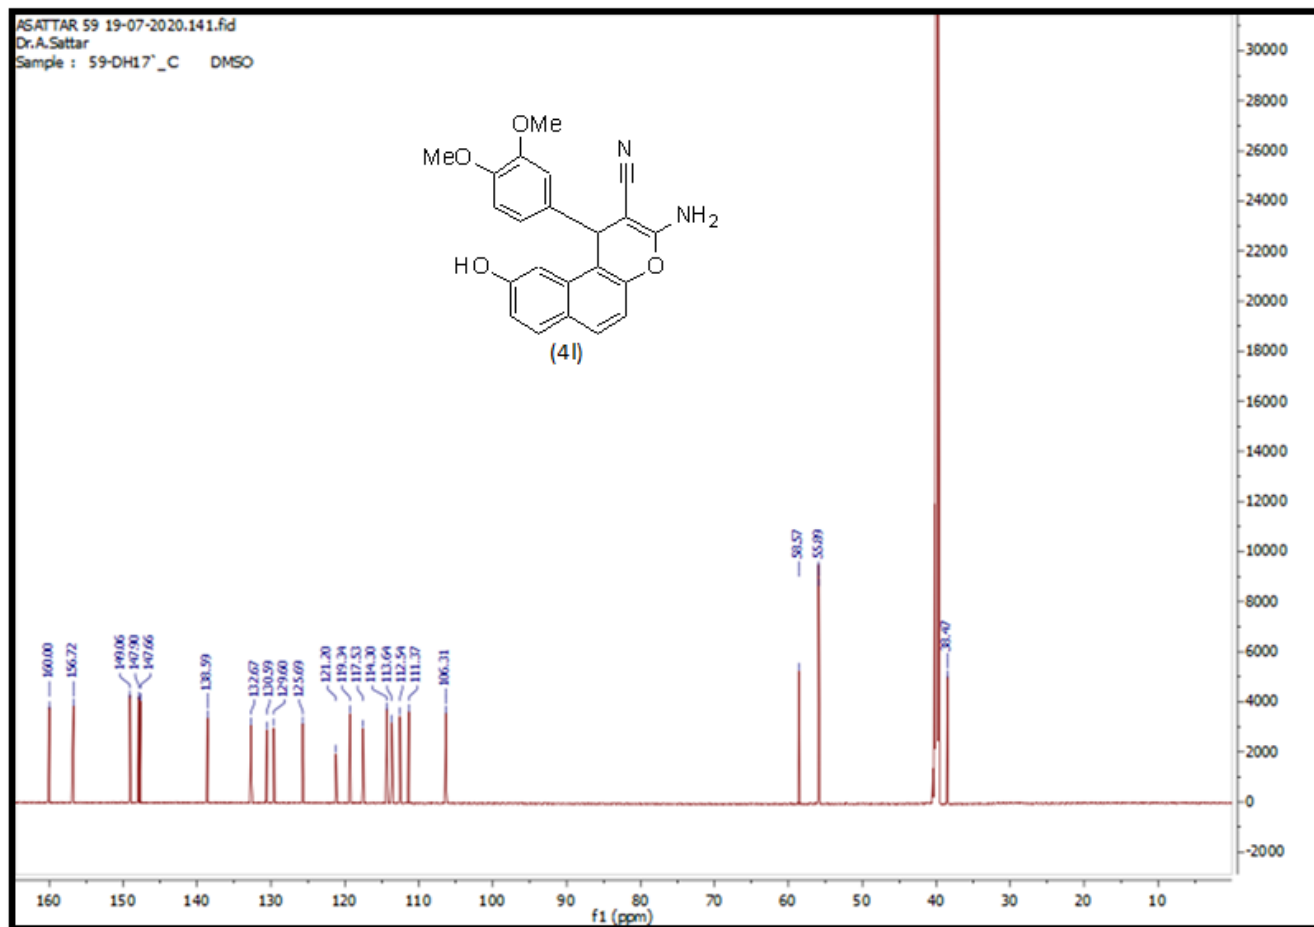

**Figure S33:** <sup>13</sup>C NMR of cpd. (4l).

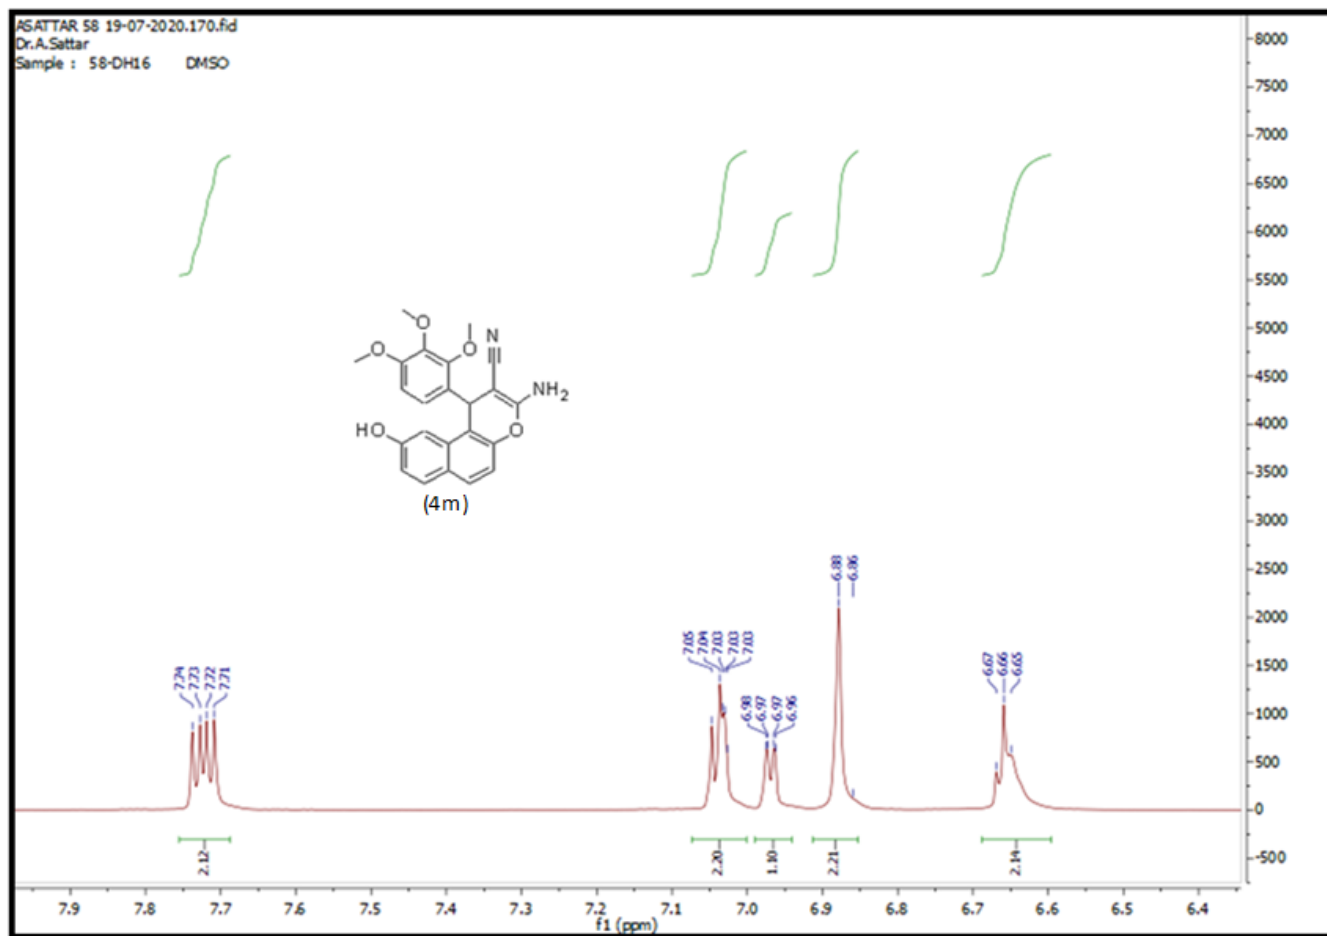

**Figure S34:** <sup>1</sup>H NMR 8.5-6.5 ppm of cpd. (4m).

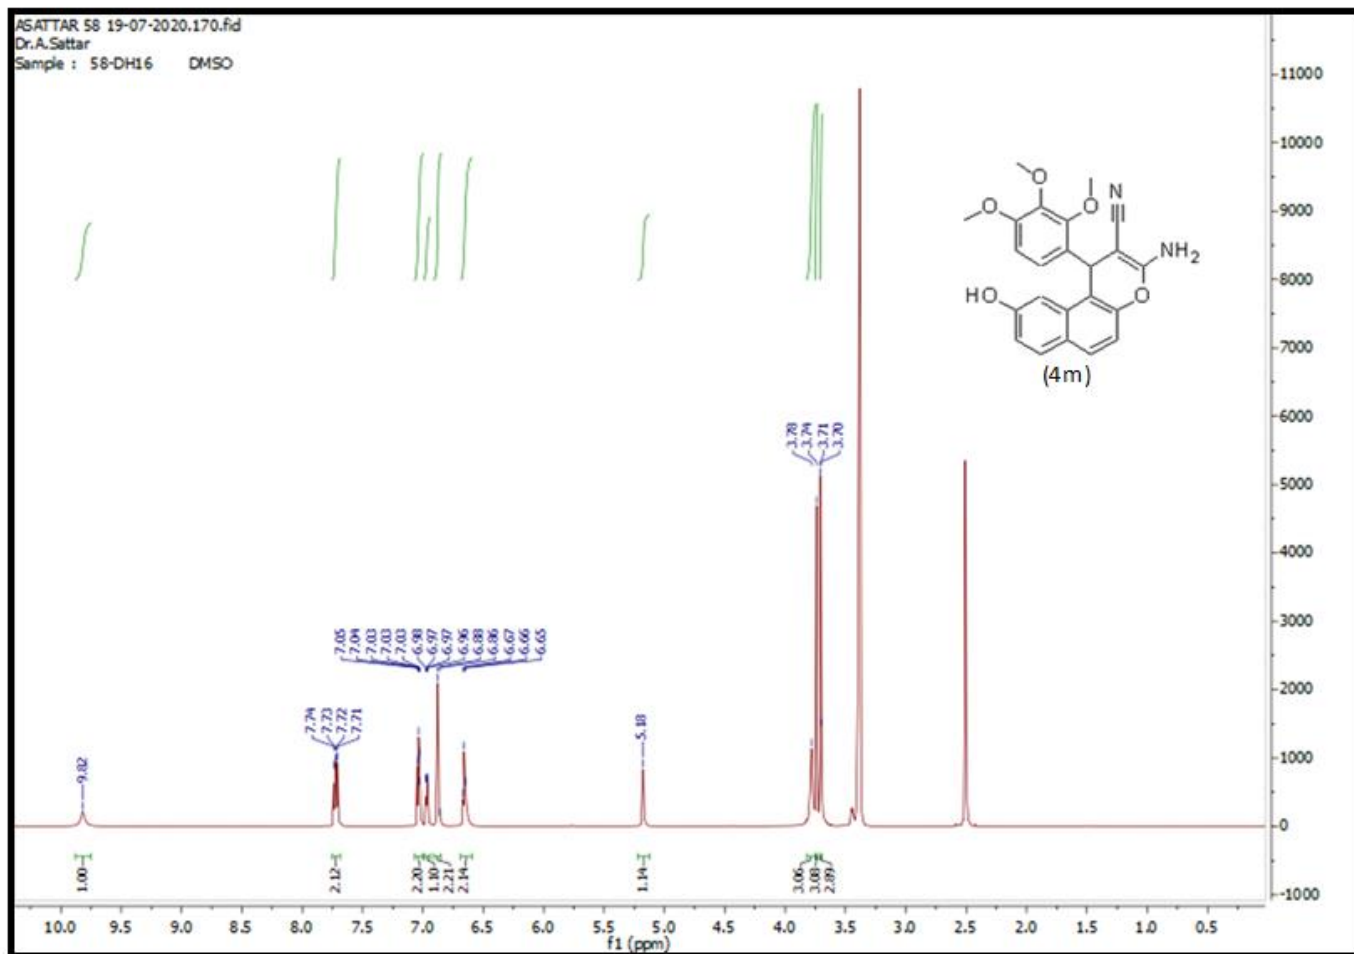

Figure S35:  $^1\text{H}$  NMR of cpd. (4m).

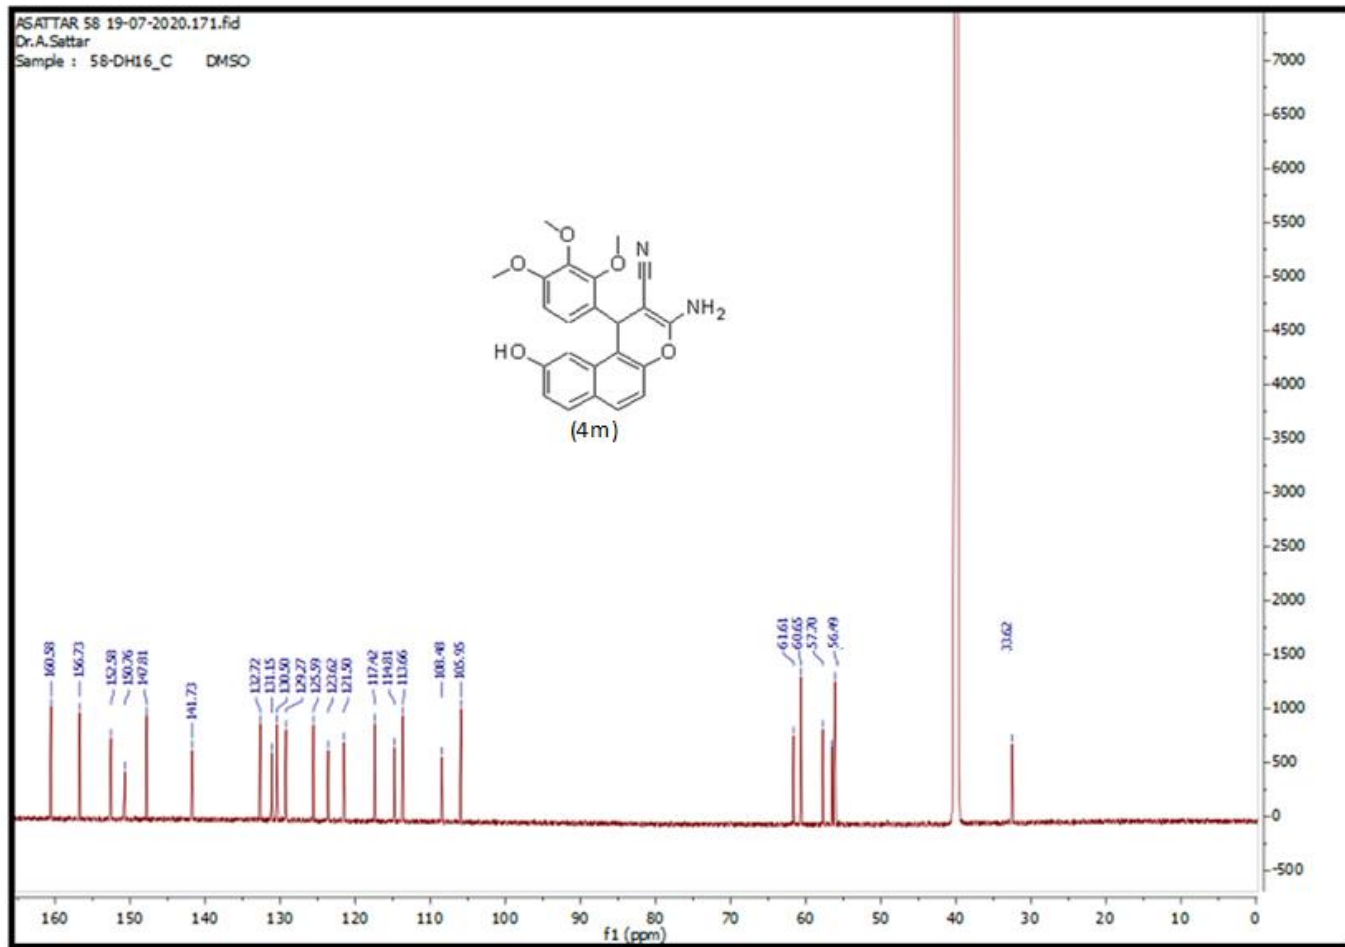

**Figure S36:** <sup>13</sup>C NMR of cpd. (4m).

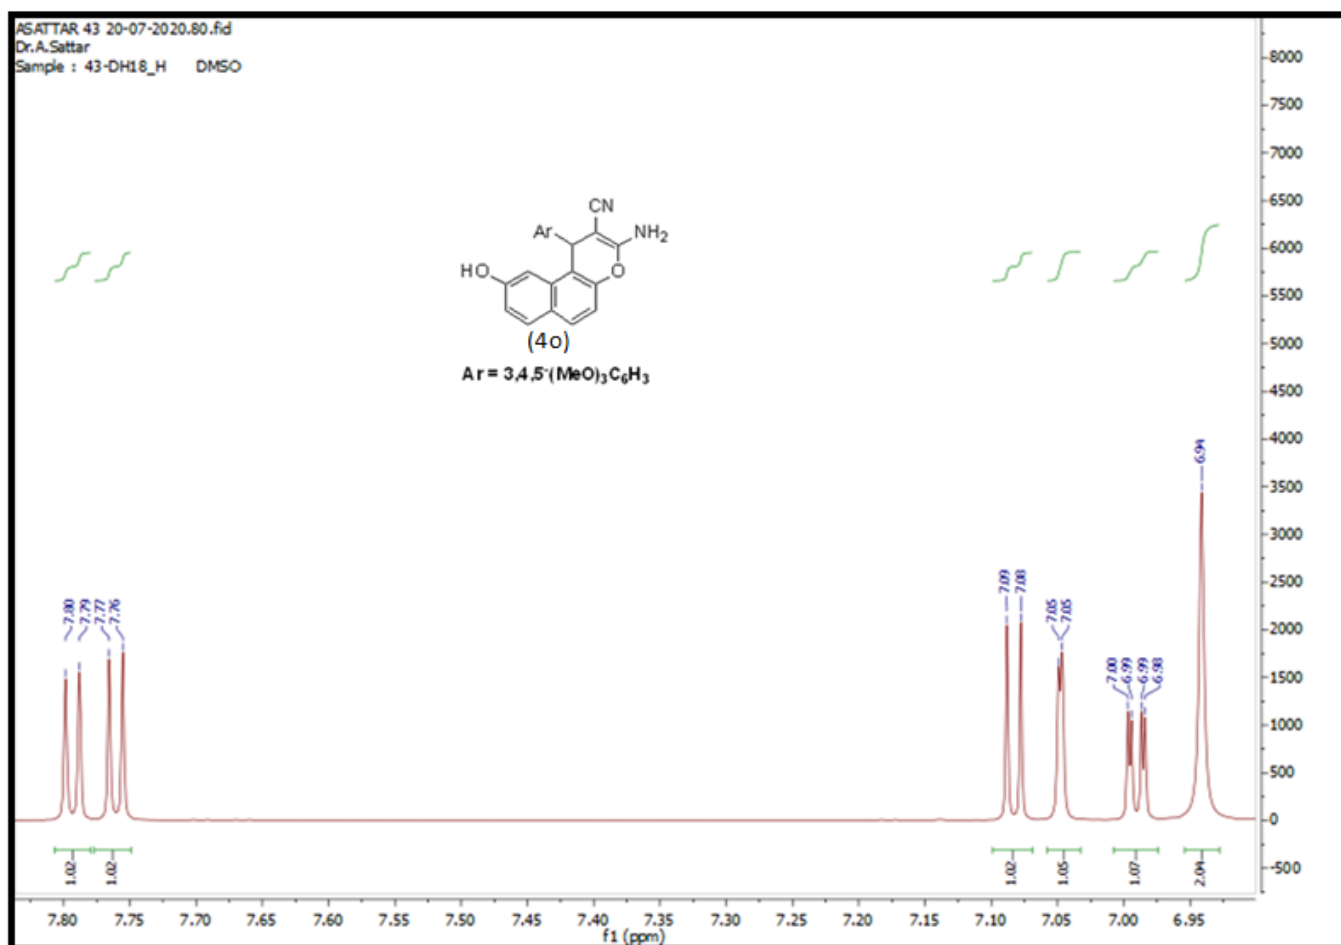

Figure S37: <sup>1</sup>H NMR 8.5-6.5 ppm of cpd. (4n).



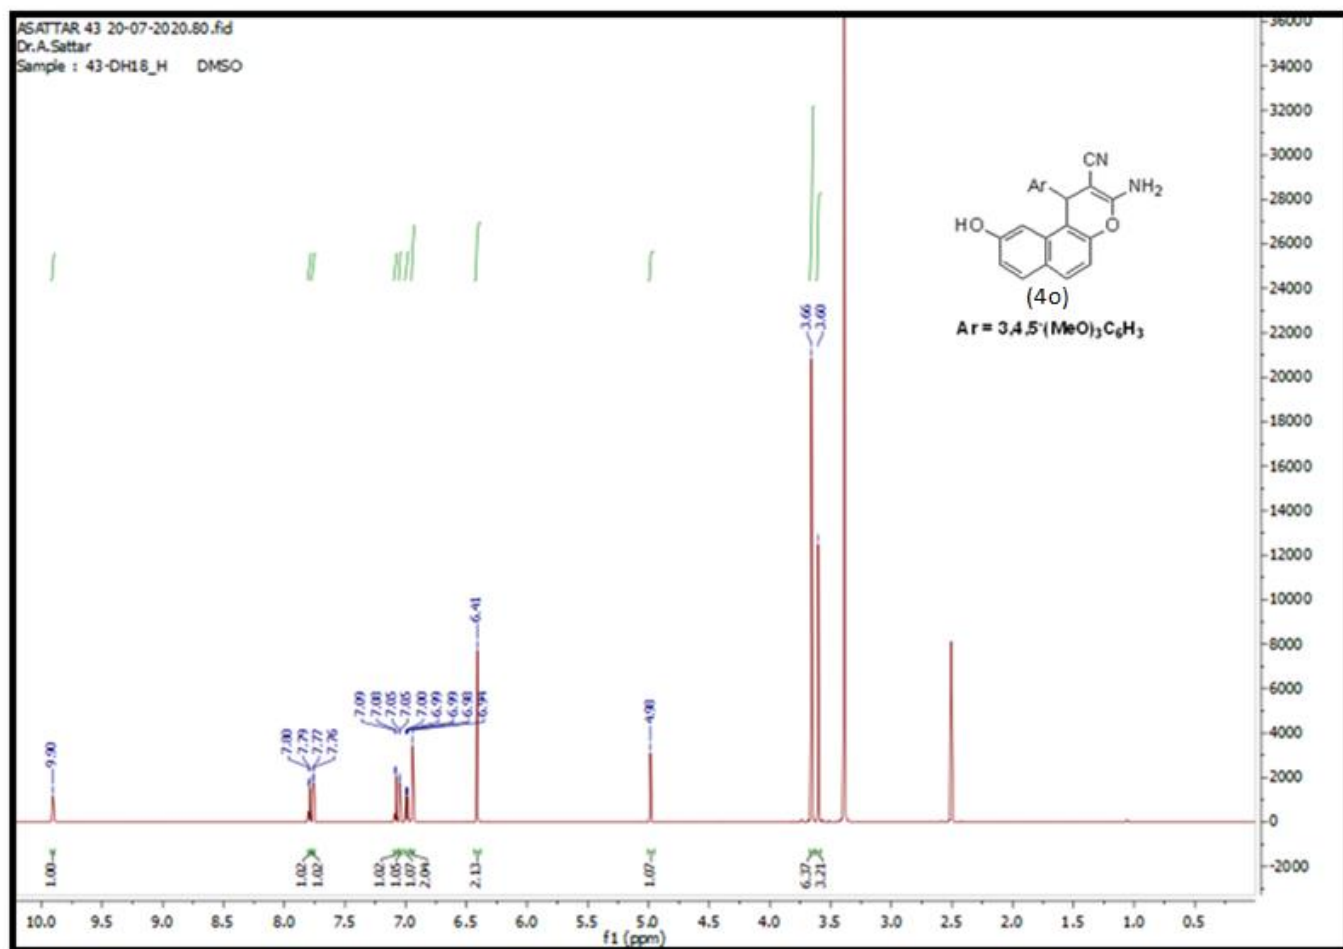

Figure S38: <sup>1</sup>H NMR of cpd. (4n).

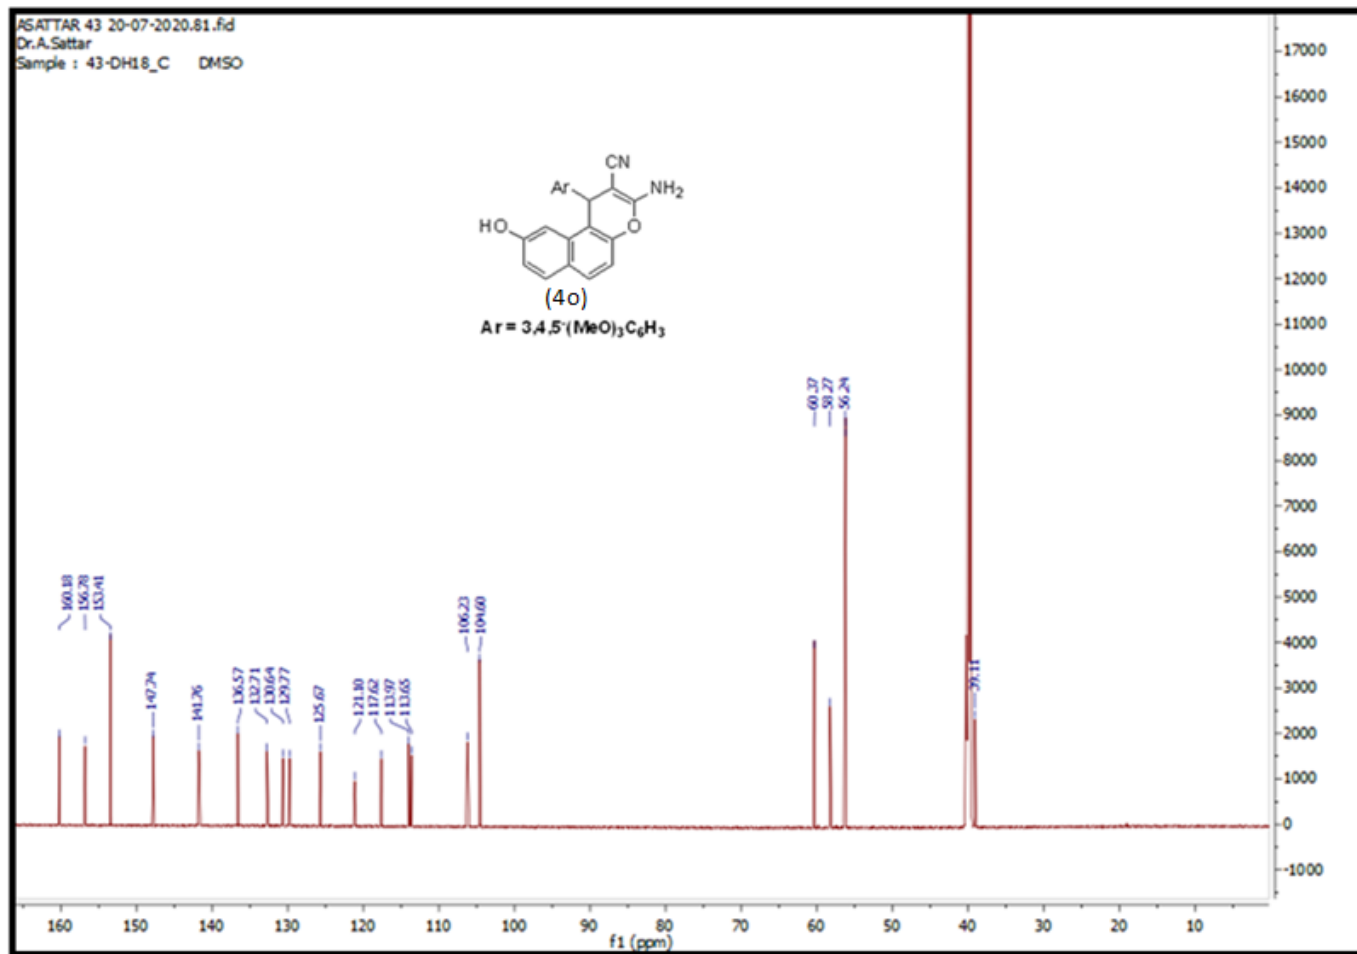

**Figure S39:** <sup>13</sup>C NMR of cpd. (4n).

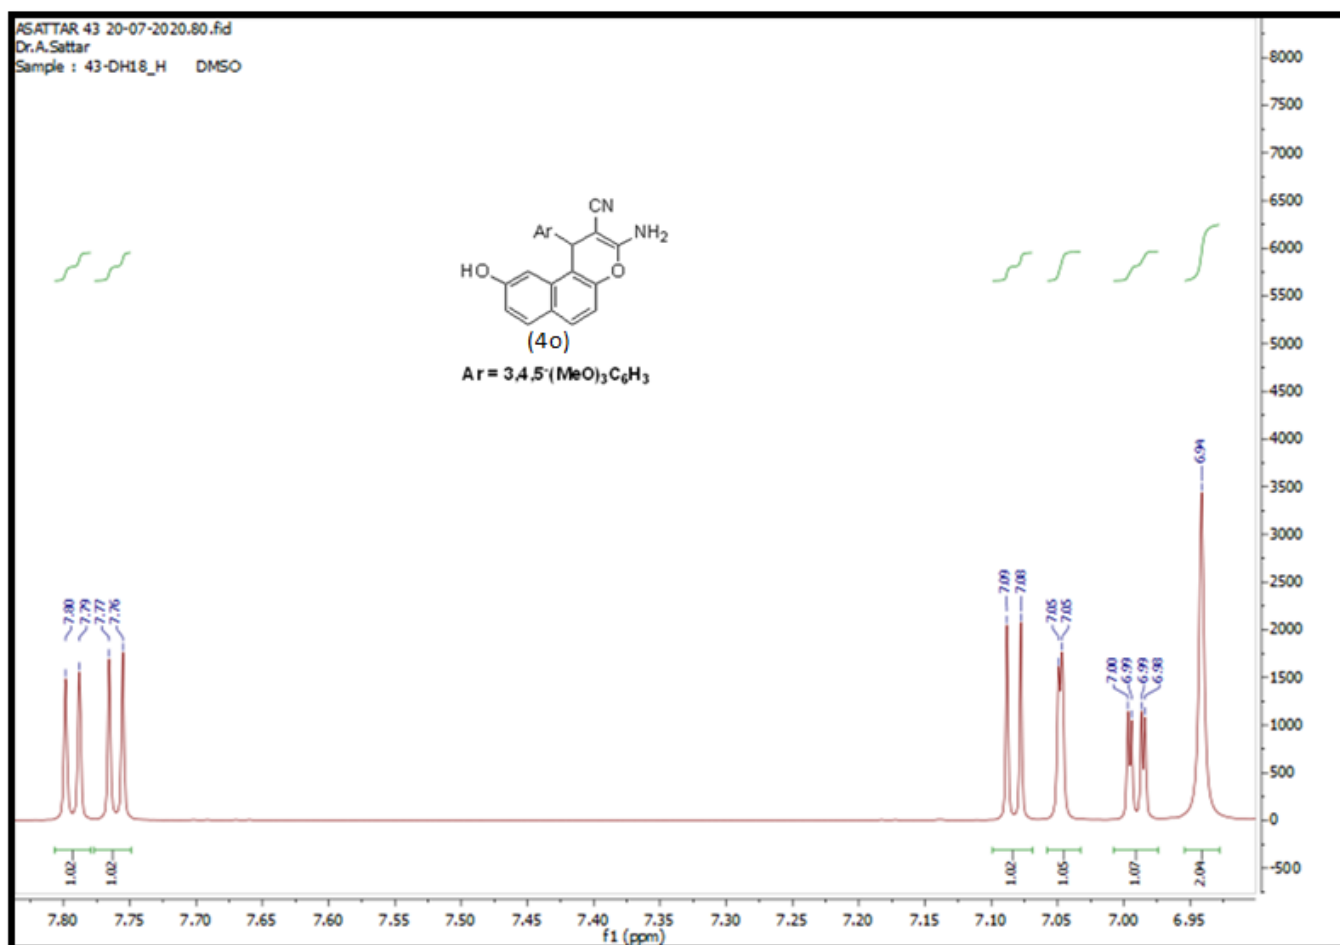

**Figure S40:** <sup>1</sup>H NMR 8.5-6.5 ppm of cpd. (4o).



**Figure S41:** <sup>1</sup>H NMR of cpd. (4o).



**Figure S42:**  $^{13}\text{C}$  NMR of cpd. (4o).

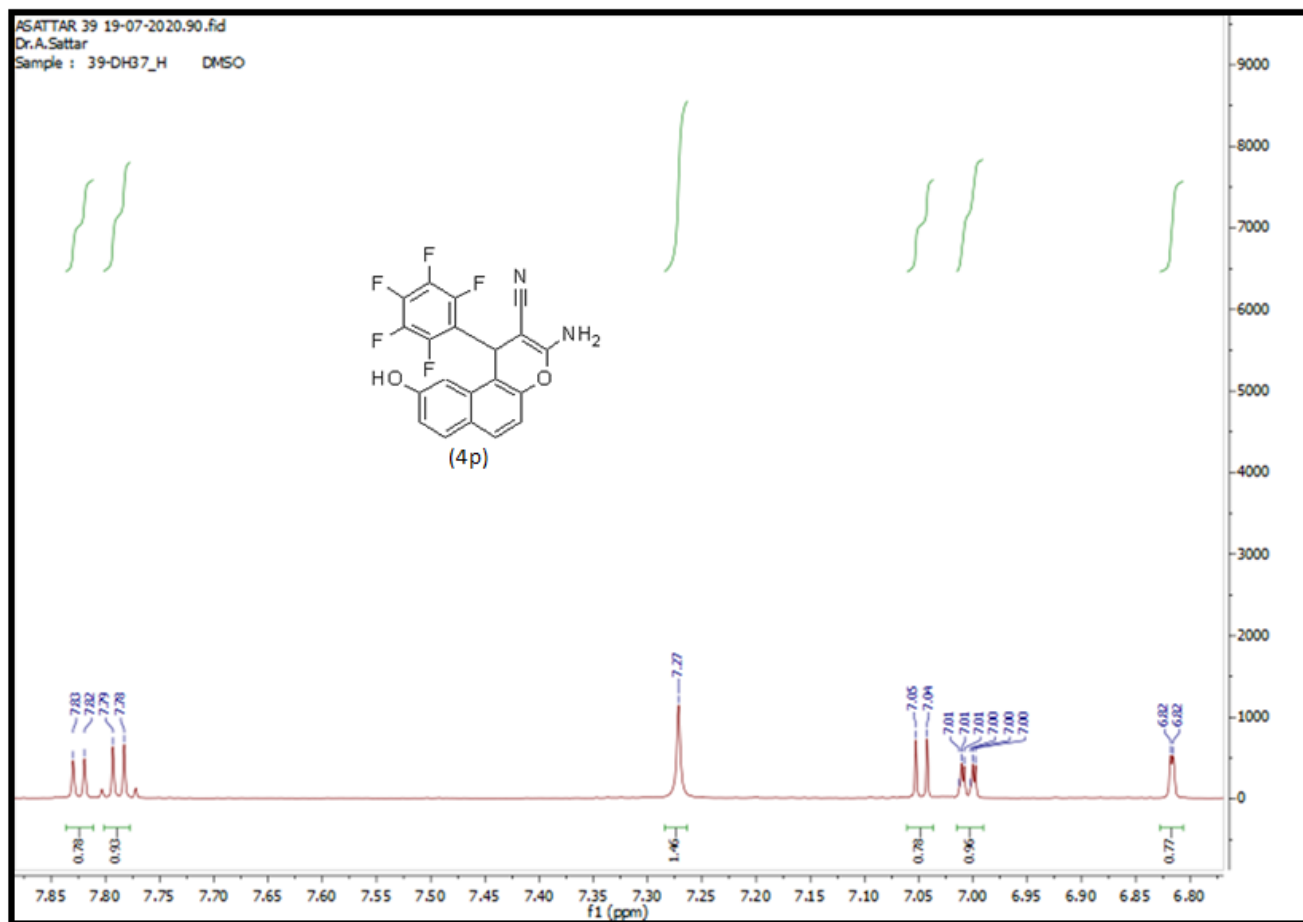

**Figure S43:**  $^1\text{H}$  NMR 8.5-6.5 ppm of cpd. (**4p**).

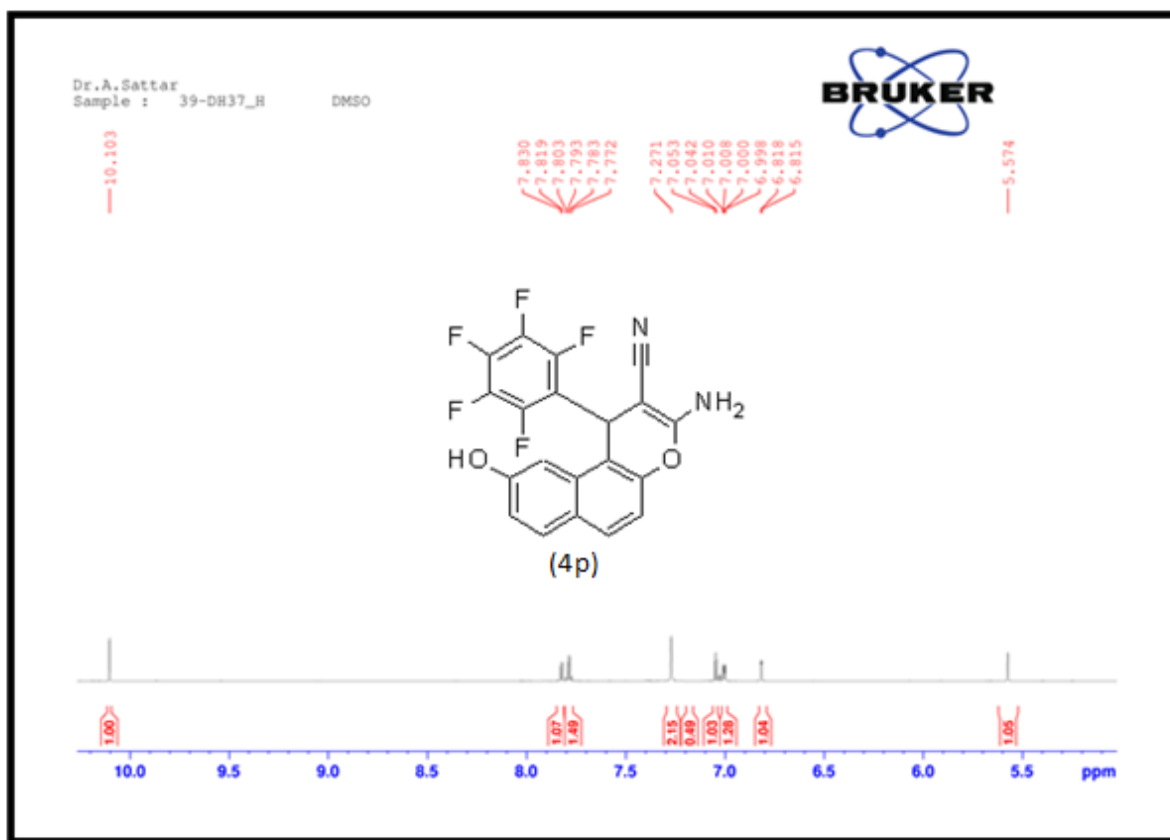

**Figure S44:** <sup>1</sup>H NMR 10.5-5.5 ppm of cpd. (4p).

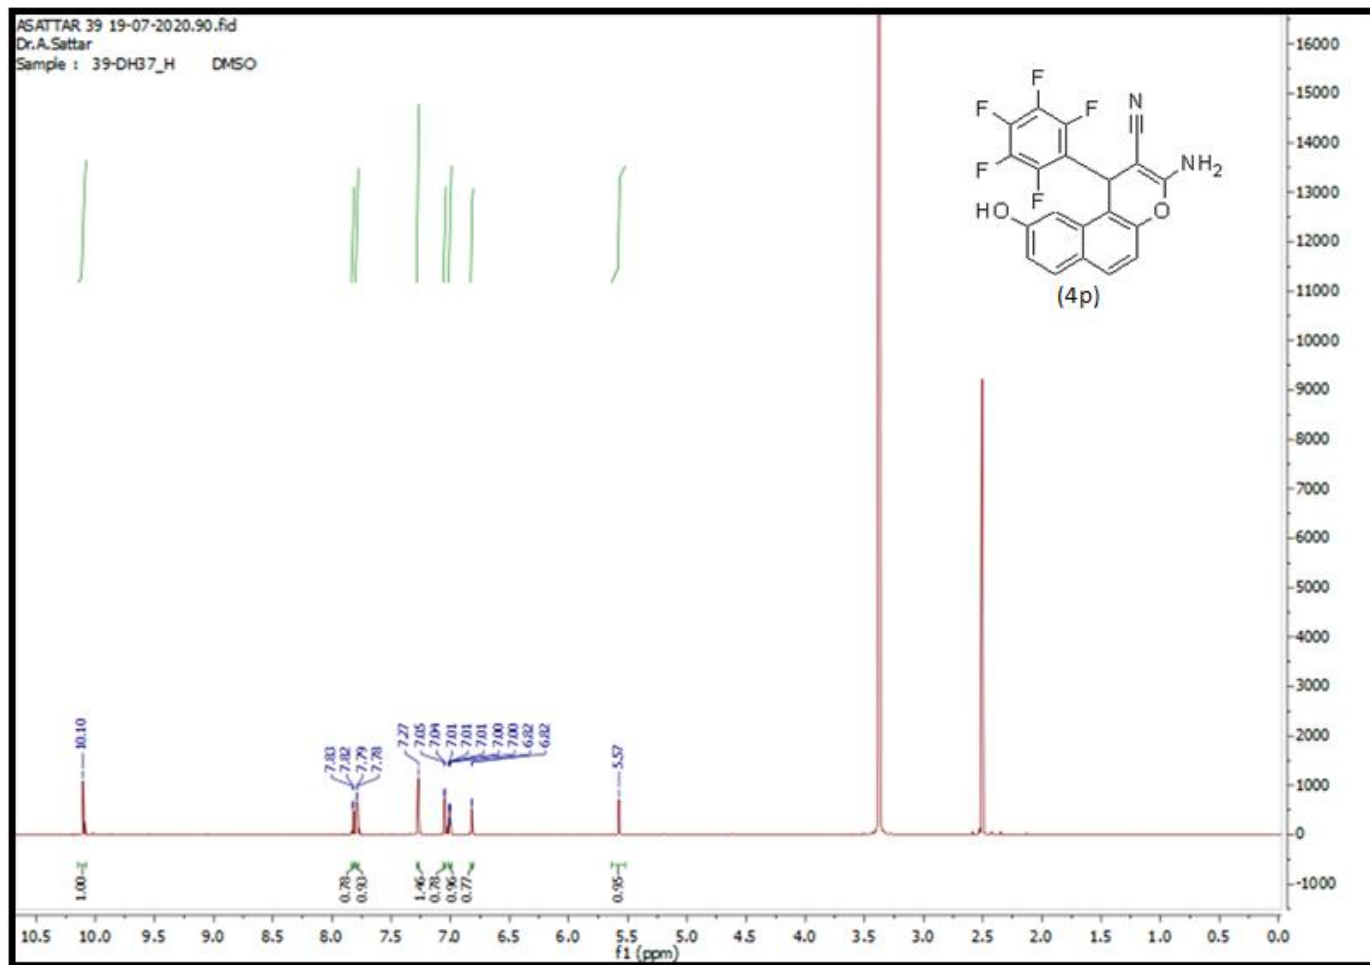

**Figure S45:**  $^1\text{H}$  NMR of cpd. (4p).



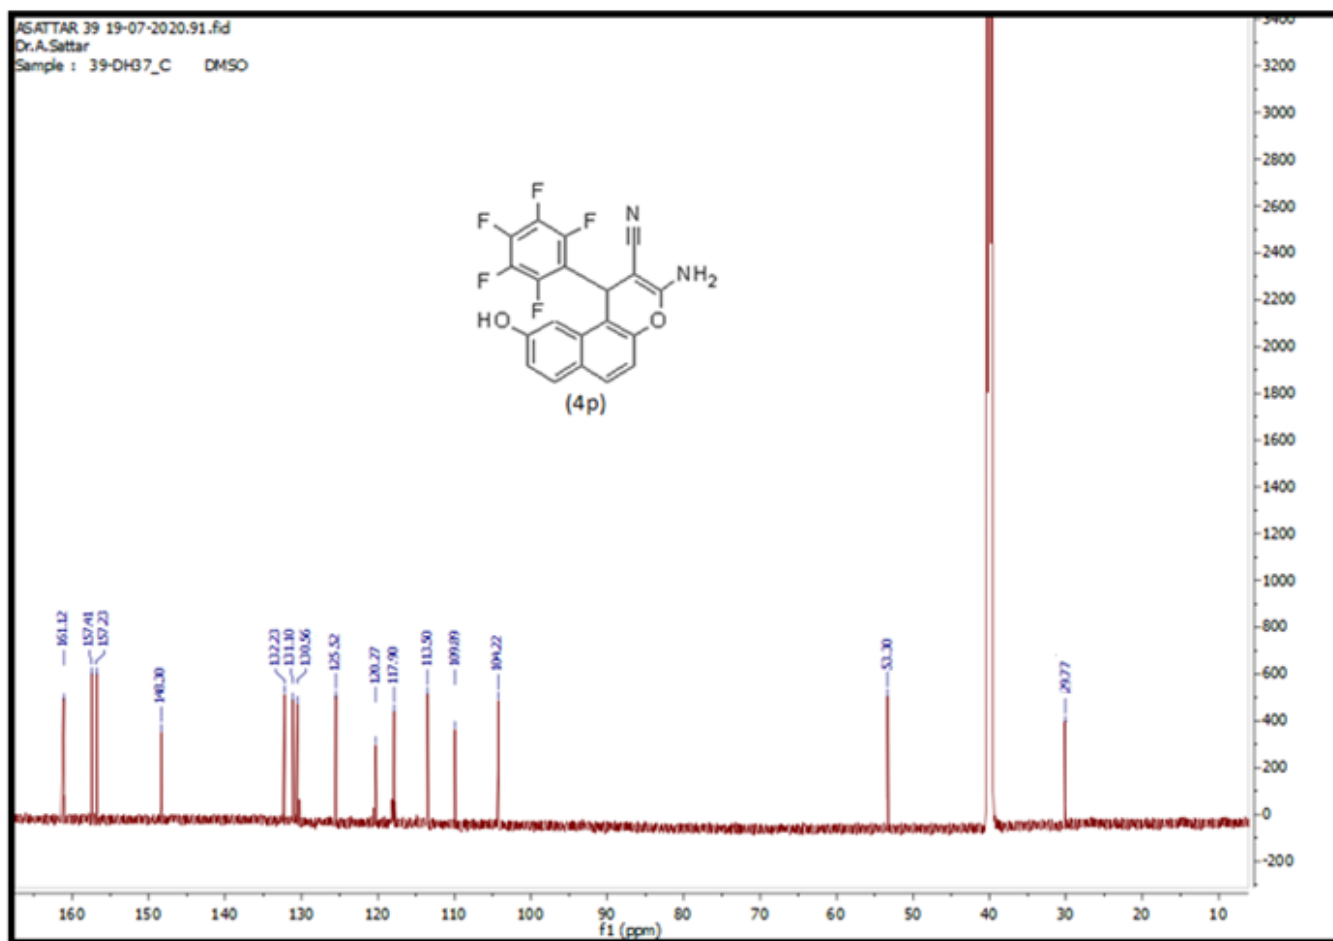

**Figure S46:** <sup>13</sup>C NMR of cpd. (4p).

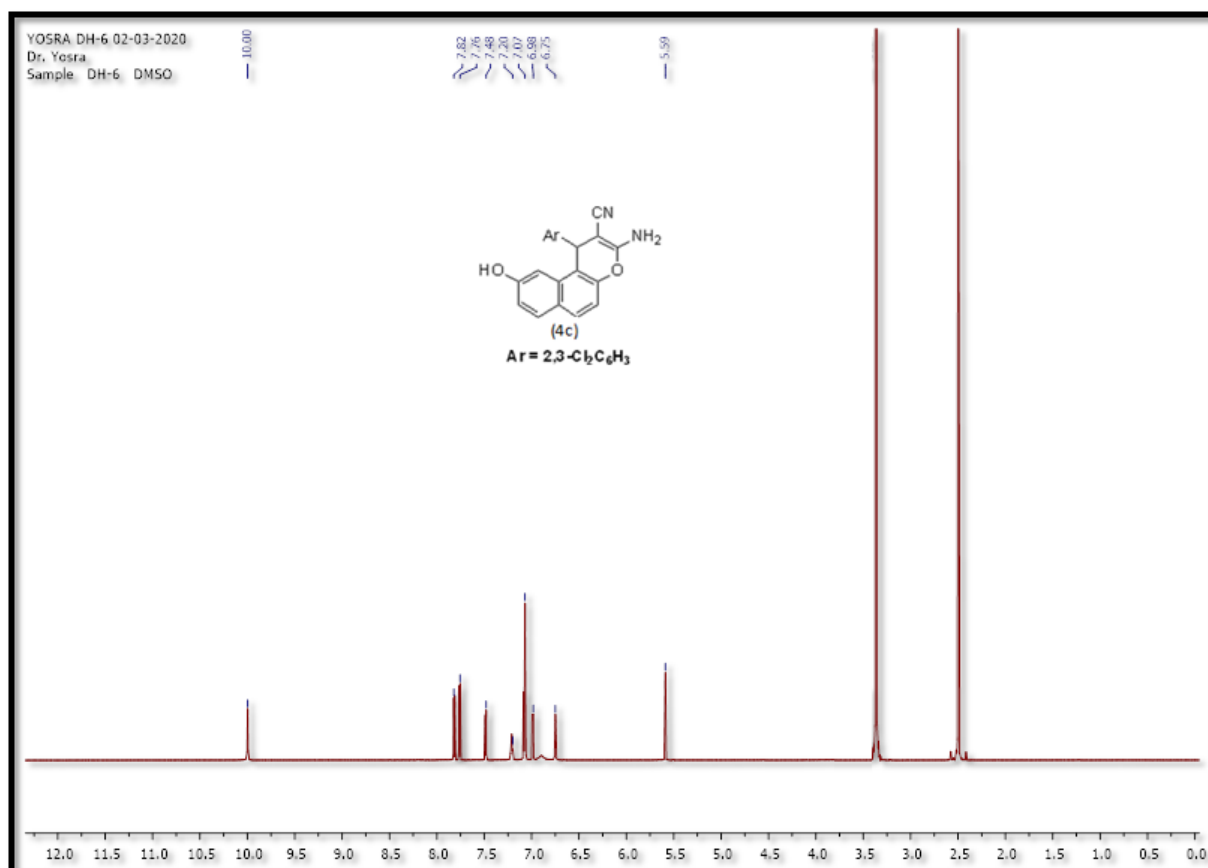

**Figure S47:** <sup>1</sup>H NMR of cpd. (4c).

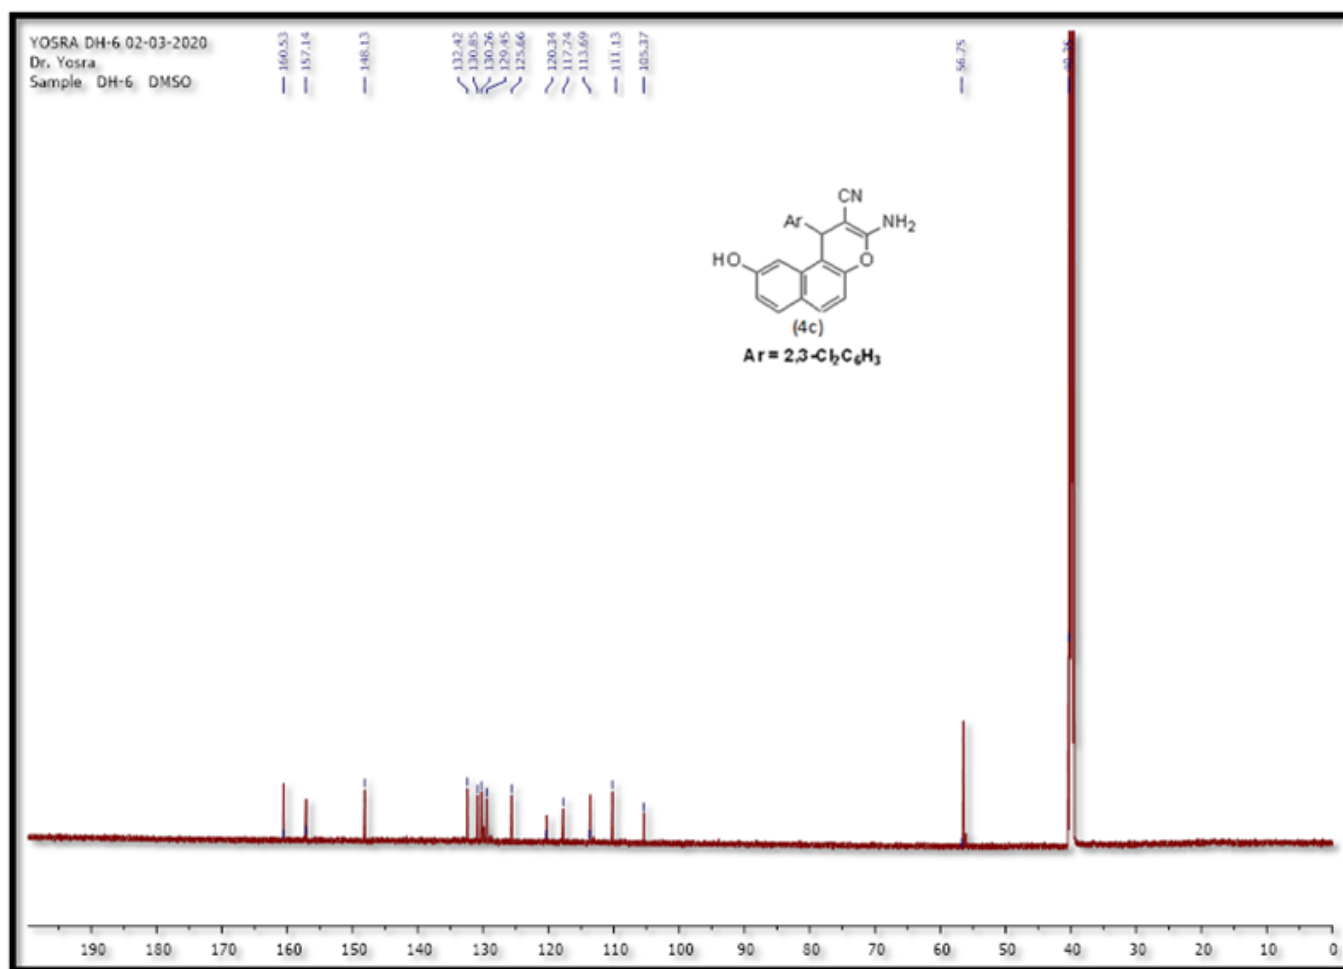

**Figure S48:** <sup>13</sup>C NMR of cpd. (4c).

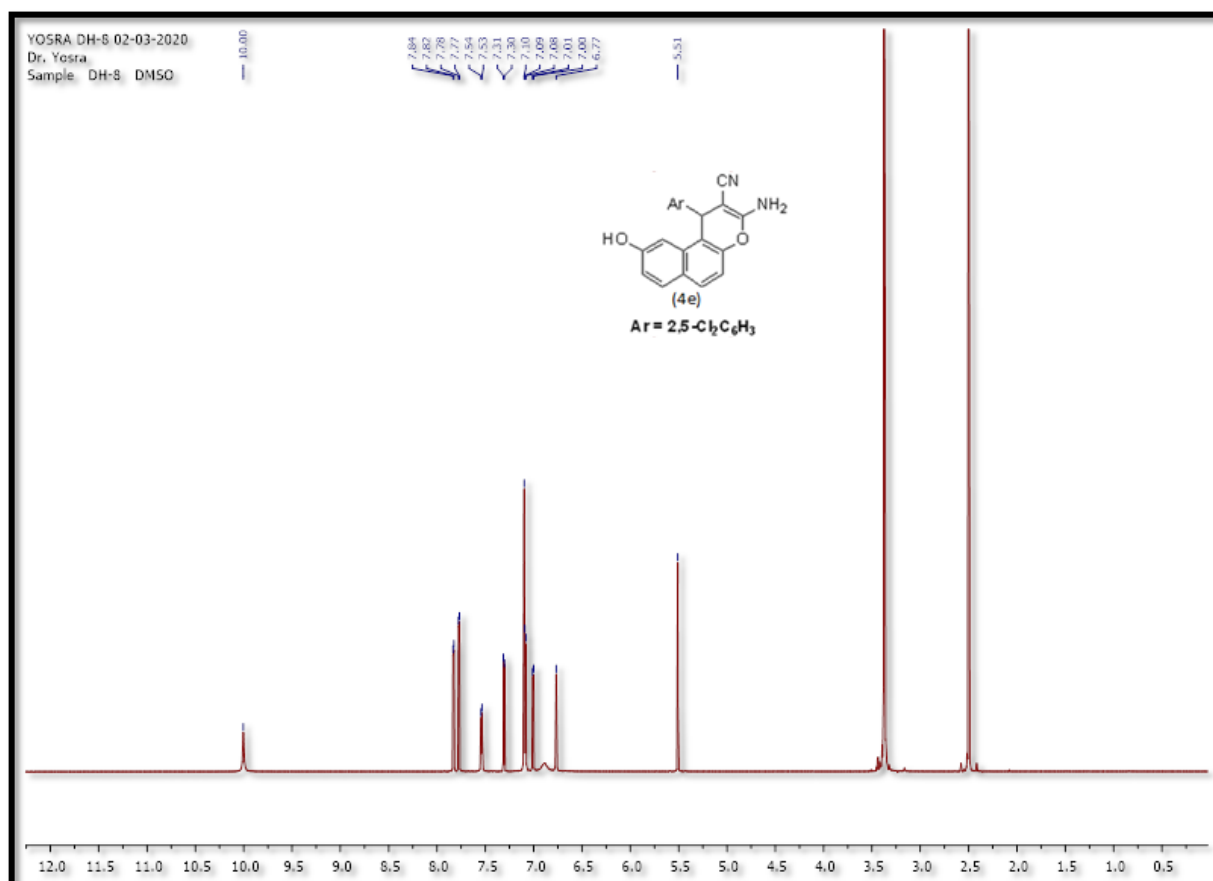

**Figure S49:** <sup>1</sup>H NMR of cpd. (4e).

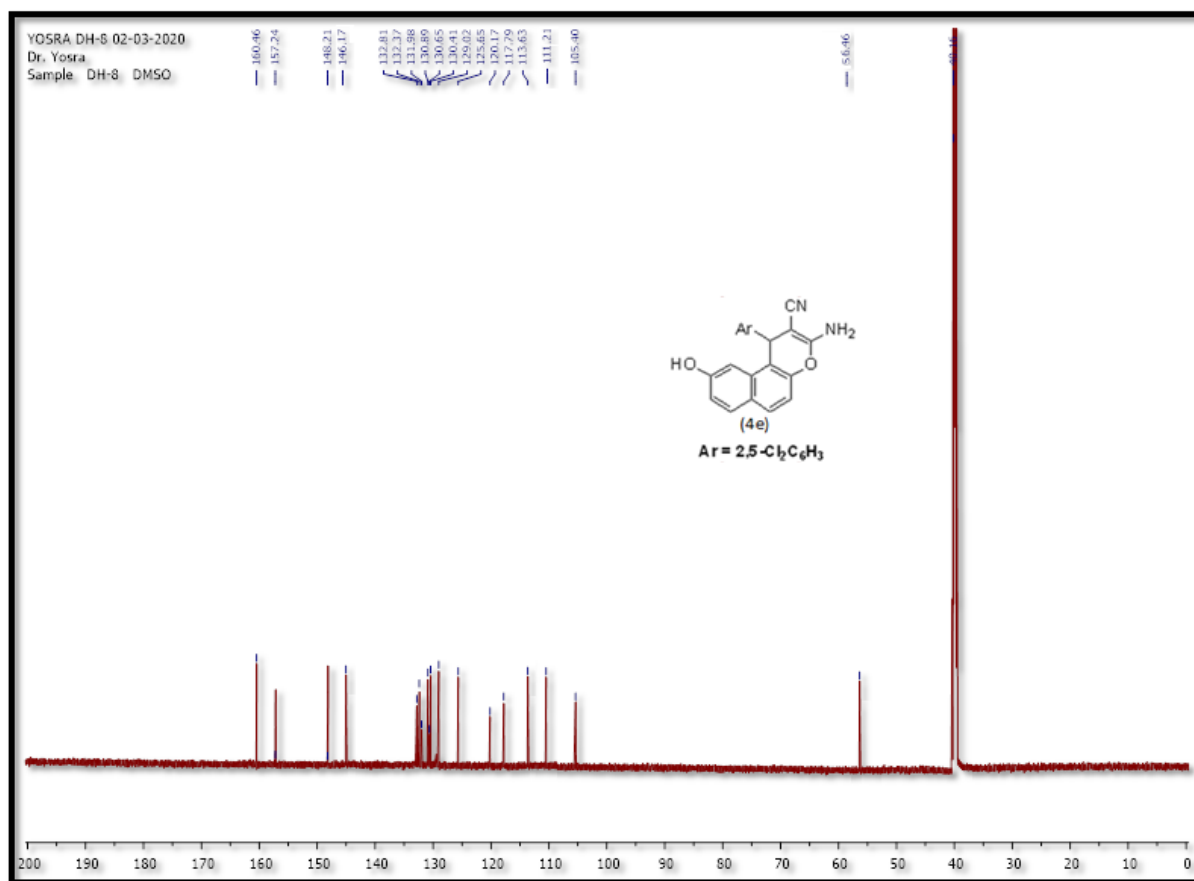

**Figure S50:**  $^{13}\text{C}$  NMR of cpd. (4e).

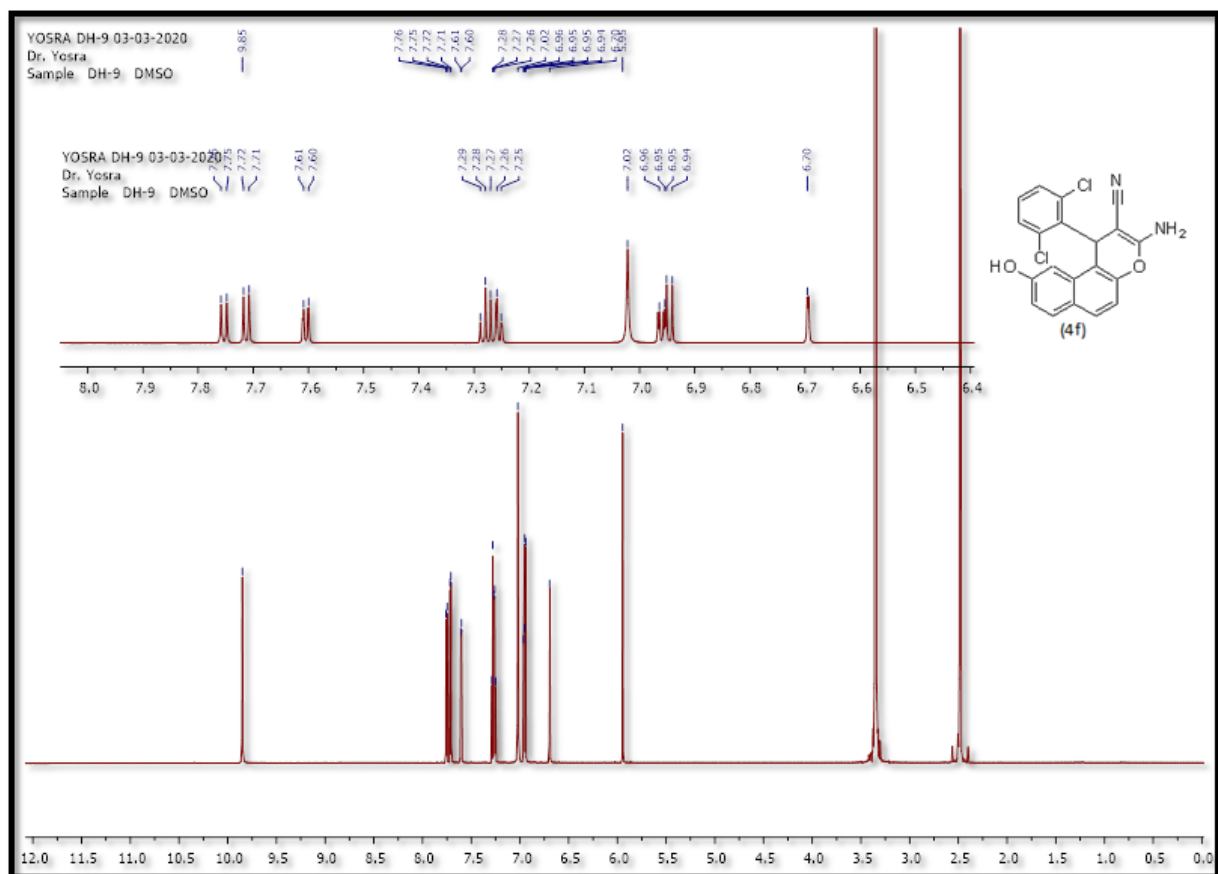

**Figure S51:**  $^1\text{H}$  NMR of cpd. (4f).

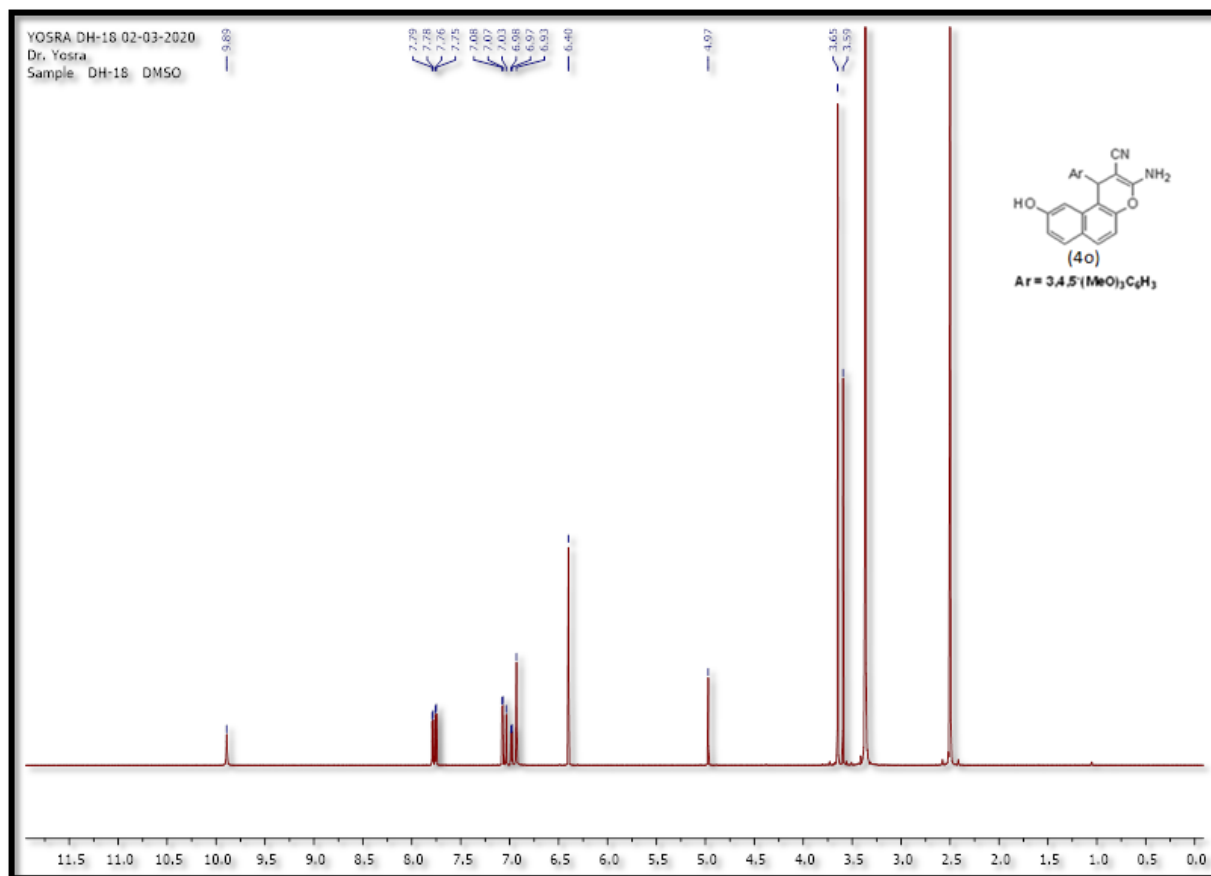

**Figure S52:**  $^1\text{H}$  NMR of cpd. (4o).

Table S1: The optimization Microwave irradiation condition for Synthesis of **4a-p**.

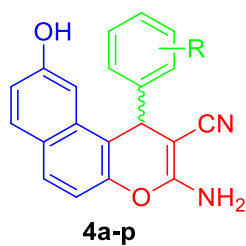

| Cpd.      | R                        | yield (%) <sup>a</sup> | yield (%) <sup>b</sup> | yield (%) <sup>c</sup> |
|-----------|--------------------------|------------------------|------------------------|------------------------|
| <b>4a</b> | 2,4-F <sub>2</sub>       | 56                     | 75                     | 88                     |
| <b>4b</b> | 2,6-F <sub>2</sub>       | 77                     | 81                     | 85                     |
| <b>4c</b> | 2,3-Cl <sub>2</sub>      | 76                     | 83                     | 89                     |
| <b>4d</b> | 2,4-Cl <sub>2</sub>      | 74                     | 85                     | 88                     |
| <b>4e</b> | 2,5-Cl <sub>2</sub>      | 79                     | 81                     | 84                     |
| <b>4f</b> | 2,6-Cl <sub>2</sub>      | 63                     | 83                     | 84                     |
| <b>4g</b> | 3,4-Cl <sub>2</sub>      | 66                     | 76                     | 83                     |
| <b>4h</b> | 2-Cl-6-F                 | 69                     | 80                     | 87                     |
| <b>4i</b> | 3,5-Br <sub>2</sub>      | 59                     | 83                     | 86                     |
| <b>4j</b> | 2-HO-3-MeO               | 72                     | 76                     | 83                     |
| <b>4k</b> | 2,4-(MeO) <sub>2</sub>   | 62                     | 84                     | 90                     |
| <b>4l</b> | 3,4-(MeO) <sub>2</sub>   | 76                     | 78                     | 89                     |
| <b>4m</b> | 2,3,4-(MeO) <sub>3</sub> | 78                     | 80                     | 90                     |
| <b>4n</b> | 2,4,5-(MeO) <sub>3</sub> | 73                     | 76                     | 87                     |
| <b>4o</b> | 3,4,5-(MeO) <sub>3</sub> | 64                     | 80                     | 89                     |
| <b>4p</b> | 2,3,4,5,6-F <sub>5</sub> | 65                     | 77                     | 79                     |

a: 200 W/ 1 min.; b: 300 W/ 1.5 min.; c: 400 W/2 min.
